# Supplementary material for: Single-ion-conducting polymer electrolytes based upon borate-chain step-growth polymers
Source: Royal Society of Chemistry journal article supplement (doi:10.1039/d4ta07236g), 2025-01-01
Supplement: d4ta07236g1.pdf [file d4ta07236g1.pdf]

## **Supporting Information for**

# **Single-ion-conducting polymer electrolytes based upon borate-chain step-growth polymers.**

Megan Van Vliet,<sup>a</sup> Stephanie L. Wunder,<sup>a</sup> and Michael J. Zdilla\*<sup>a</sup>

## Contents

|                                                                          |    |
|--------------------------------------------------------------------------|----|
| FTIR Spectroscopy .....                                                  | 3  |
| NMR Spectroscopy .....                                                   | 8  |
| GPC .....                                                                | 14 |
| Thermal Analysis .....                                                   | 15 |
| Electrochemical Impedance Spectroscopy .....                             | 17 |
| Nyquist plots .....                                                      | 17 |
| Crystallographic Tables .....                                            | 27 |
| $C_{58}H_{66}B_2Li_2O_6$ ( <b>3-M</b> ) .....                            | 27 |
| $C_{58}H_{66}B_2Li_2O_6 \cdot 2 C_6H_6$ ( <b>3-M</b> ·2 $C_6H_6$ ) ..... | 31 |

# FTIR Spectroscopy

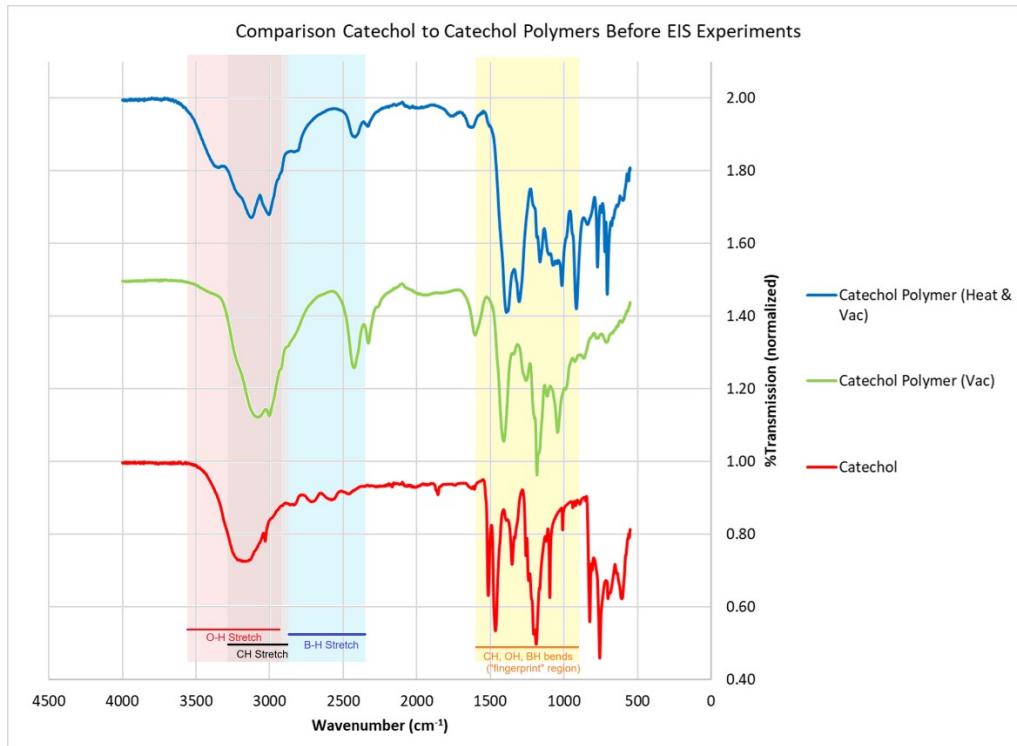

**Figure S1.** FTIR spectra of catechol precursor and samples of polymer **3-O**.

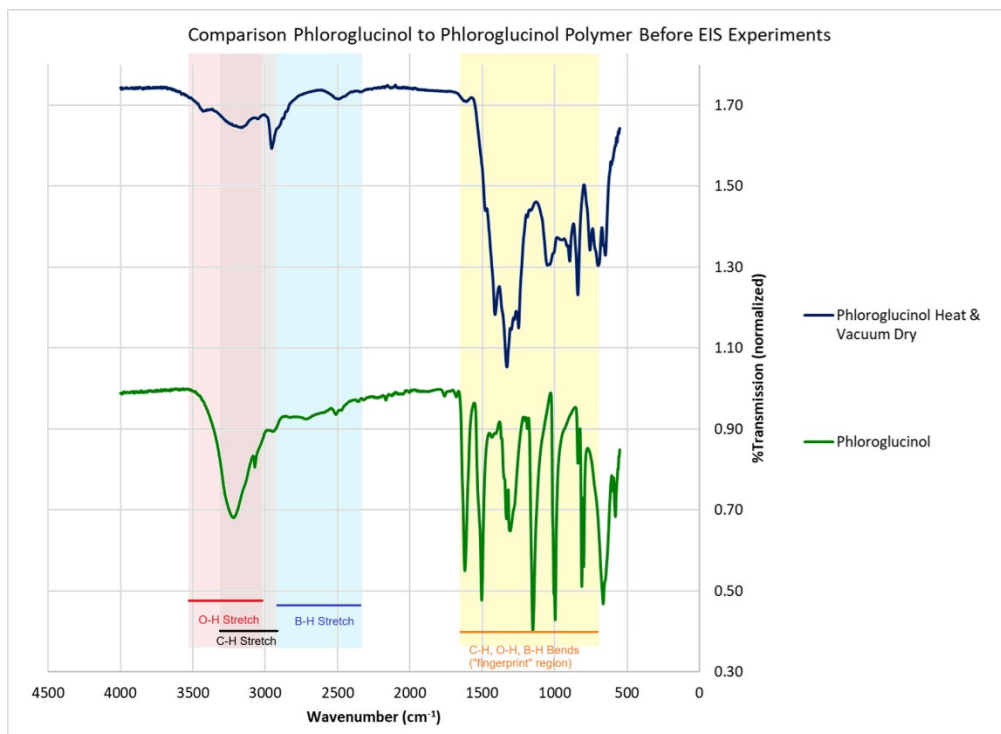

**Figure S2.** FTIR spectra of phloroglucinol precursor and polymer **4-O**.

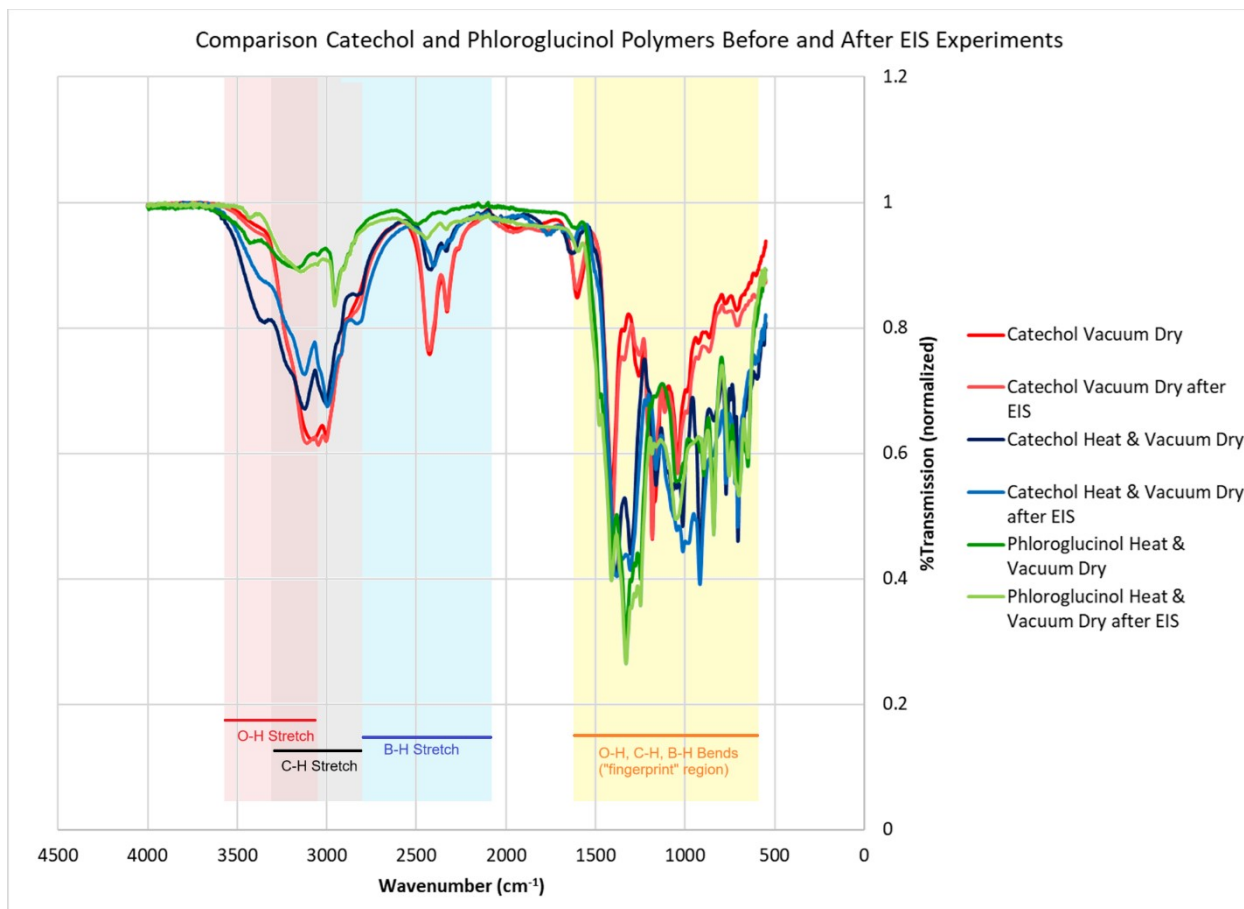

**Figure S3:** FTIR Spectra of Catechol- and Phloroglucinol-based polymers **3-O** and **4-O** before and after Electrochemical Impedance Spectroscopy

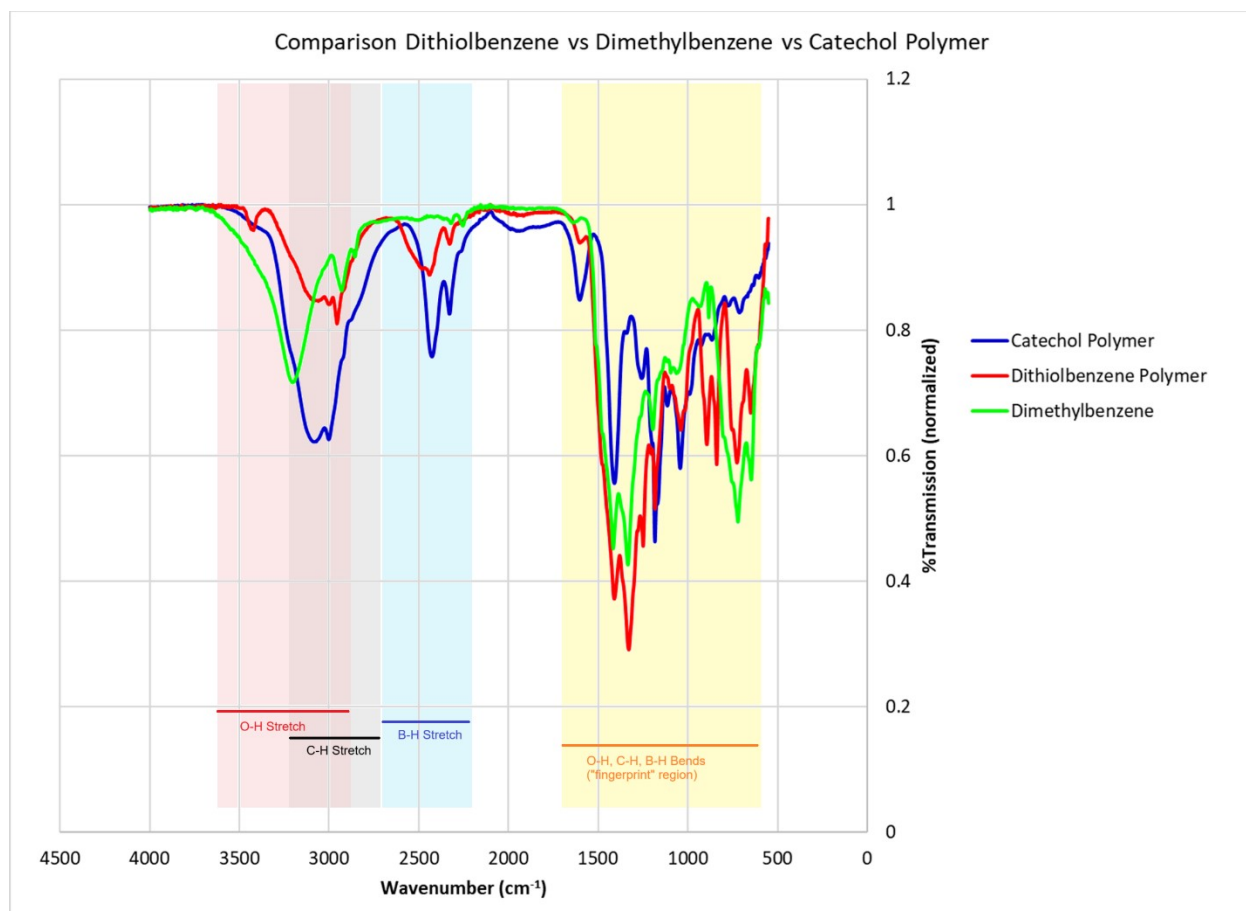

**Figure S4:** FTIR Spectra of Catechol- and Phloroglucinol-based polymers **3-O**, **3-S**, and **3-CH<sub>2</sub>**.

**Table S1: Common FTIR Signatures from Literature and Observed Experimental Wavenumbers in 3-O and 4-O Pertinent to Aromatics and Boron-containing Molecules<sup>4-10</sup>**

| <i>Chemical Group</i>           | <i>Literature Wavenumber Range</i>                                                             | <i>Catechol Reagent</i>  | <i>Catechol Polymer Vacuum Heat &amp; Vacuum</i>                                        | <i>Phloroglucinol Reagent</i>                 | <i>Phloroglucinol Polymer Heat &amp; Vacuum Dry</i> |
|---------------------------------|------------------------------------------------------------------------------------------------|--------------------------|-----------------------------------------------------------------------------------------|-----------------------------------------------|-----------------------------------------------------|
| <i>Intermolecular Alcohols</i>  | 3600-3200 (s,b)<br>3200-2700 (b)                                                               | 3490-3050<br>2840-2460   | 3200(b) 3250(b)<br>2800(b) 2820(b)                                                      | 3470-3080<br>3220-2720                        | 3640-3017<br>2955                                   |
| <i>In-plane O-H Stretch</i>     | 1350                                                                                           | 1350                     |                                                                                         | 1330                                          | 1330                                                |
| <i>Aromatic C-H Stretch</i>     | 3100-3000 (m,s)                                                                                | 3030                     | 3080 3130                                                                               | 3070                                          |                                                     |
| <i>1,4-Disubstituted</i>        | 3100-3000(w)<br>2000-1700(w)<br>1650-1550(m,m)<br>1150-1100(m,m)<br>775-700(s,s)<br>900-800(s) | 1630,1520<br>1100<br>700 | 3010 3000<br>2080-1725 2000-1900<br>1600 1635<br>1190,1110 1160,1070<br>770,710 770,710 | 3070<br>1770<br>1620,1504<br>1210,1200<br>800 | 1620<br>1200,1170<br>755,700                        |
| <i>1,3,5-Trisubstituted</i>     | 950-850<br>700                                                                                 |                          |                                                                                         | 840<br>675                                    | 840                                                 |
| <i>Aromatic C-H Stretch</i>     | 3050                                                                                           | 3030                     |                                                                                         | 3070                                          |                                                     |
| <i>C-H Bending</i>              | 860-680(s)<br>1430-1290                                                                        | 830,760<br>1400          | 770 770<br>1400 1390                                                                    | 840,810,800                                   |                                                     |
| <i>C=C Bending</i>              | 1700-1500(m,m)<br>1470                                                                         | 1630,1520<br>1470        | 1725,1600 1760,1630                                                                     | 1770,1680<br>1430                             |                                                     |
| <i>Out of plane C=C Bending</i> | 700                                                                                            | 700                      | 710 710                                                                                 | 675                                           |                                                     |
| <i>O-Aryl</i>                   | 1220(s) or<br>1100(m)                                                                          | 1275                     | 1110 1100                                                                               | 1300<br>1010                                  | 1300<br>1010                                        |
| <i>C-O</i>                      | 1150-1050                                                                                      | 1100                     | 1040 1050                                                                               | 1150                                          | 1050                                                |
| <i>B-Aryl</i>                   | 1470-1430                                                                                      |                          |                                                                                         |                                               | 1415                                                |
| <i>B-O</i>                      | 1450-1425<br>1360-1310<br>1280-1260<br>890-860<br>640-600                                      |                          | 1350 1310<br>1260<br>895,865 850<br>635                                                 |                                               | 1250<br>895<br>650                                  |
| <i>B-H</i>                      | 2630-2350                                                                                      |                          | 2430,2330 2420,2330                                                                     |                                               | 2500,2350                                           |
| <i>B-H scissoring modes</i>     | 1620-1440<br>1205-1140<br>1075-1010                                                            |                          | 1000 1010                                                                               |                                               | 960                                                 |

**Table S2. Common FTIR Signatures from Literature and Observed Experimental Wavenumbers in 3-O, 3-S, and 3-CH<sub>2</sub> Pertinent to Aromatics and Boron-containing Molecules<sup>4-10</sup>**

| <i>Chemical Group</i>           | <i>Literature Wavenumber Range</i>                                                             | <i>Catechol Polymer (Heat &amp; Vacuum)</i>       | <i>Dithiobenzene Polymer</i>    | <i>Dimethylbenzene Polymer</i> |
|---------------------------------|------------------------------------------------------------------------------------------------|---------------------------------------------------|---------------------------------|--------------------------------|
| <i>Intermolecular Alcohols</i>  | 3600-3200 (s,b)<br>3200-2700 (b)                                                               | 3250(b)<br>2820(b)                                |                                 |                                |
| <i>In-plane O-H Stretch</i>     | 1350                                                                                           |                                                   |                                 |                                |
| <i>Aromatic C-H Stretch</i>     | 3100-3000 (m,s)                                                                                | 3130                                              | 3090,2960                       | 3200,2930                      |
| <i>1,4-Disubstituted</i>        | 3100-3000(w)<br>2000-1700(w)<br>1650-1550(m,m)<br>1150-1100(m,m)<br>790-700(s,s)<br>900-800(s) | 3000<br>2000-1900<br>1635<br>1160,1070<br>770,710 | 3000<br>2000<br>1600<br><br>840 | 1640<br><br><br>820            |
| <i>Aromatic C-H Stretch</i>     | 3050                                                                                           |                                                   |                                 |                                |
| <i>C-H Bending</i>              | 860-680(s)<br>1430-1290                                                                        | 770<br>1390                                       | 760<br>1410,1330                | 760,650<br>1420,1340           |
| <i>C=C Bending</i>              | 1700-1500(m,m)<br>1470                                                                         | 1760,1630                                         |                                 |                                |
| <i>Out of plane C=C Bending</i> | 700                                                                                            | 710                                               | 720                             | 730                            |
| <i>O-Aryl</i>                   | 1220(s) or<br>1100(m)                                                                          | 1100                                              |                                 |                                |
| <i>C-O</i>                      | 1150-1050                                                                                      | 1050                                              |                                 |                                |
| <i>B-O or *B-C vibrations</i>   | 1450-1425<br>1360-1310<br>1280-1260<br>890-860                                                 | 1310<br>1260<br>850                               |                                 | 1420*<br>1340*<br><br>880*     |
| <i>B-H</i>                      | 2630-2350                                                                                      | 2420,2330                                         | 2475,2325                       | 2330,2260                      |
| <i>B-H scissoring modes</i>     | 1620-1440<br>1205-1140<br>1075-1010                                                            | 1010                                              | 1180<br>1005                    | 1195<br>1060                   |
| <i>BH<sub>2</sub> "wagging"</i> | 975-945                                                                                        |                                                   |                                 | 950                            |
| <i>S-H, thiophenols</i>         | 2700-2500 (w)                                                                                  |                                                   | 2545                            |                                |
| <i>C-S</i>                      | 710-570 (w)<br>1300<br>1275<br>1025                                                            |                                                   | 650<br>1330<br>1250<br>1040     |                                |
| <i>C=S</i>                      | 1225-1030                                                                                      |                                                   |                                 |                                |
| <i>Sulfonamides</i>             | 3400(s)                                                                                        |                                                   | 3440                            |                                |

# NMR Spectroscopy

In the figures below, the proton and boron NMR are shown for the catechol borohydride polymer and there is strong indication that the lithiated catechol reacts with the boron reagent due to the upfield shift of the aromatic protons ( $\delta$  8.66 to  $\delta$  7.21) due to the shielding of nuclei. Further, the upfield shift is expected because of the starting material versus polymer functional group polarity. In comparison of alcohol to ether groups (-OH versus -O-), alcohols are high on the polarity scale whereas ethers are low; for reference a polarity index of non-polar pentane scales at 0.0 and polar water scales at 9.0—methanol has a polarity index of 5.1 and ethyl ether is 2.8.<sup>11</sup> Upon polymerization, the atoms become more “shielded” due to the negative formal charge on B, and should shift upfield as the catechol lithiated alcohol groups are then converted into ether linker points for the boron reagent.

Also shown in Figures S5-S8 is the <sup>11</sup>B-NMR spectra of the catechol borohydride polymer which have a large range of chemical shifts. Alkyl boranes 90 to 40ppm, borates 30 to 10ppm, BX<sub>3</sub> 50 to -20ppm, boron complexes 20 to -80ppm, and BX<sub>4</sub> 20 to -120ppm are some typical chemical shifts. The peaks of the catechol borohydride polymer confirm tetravalently coordinated boron centers.



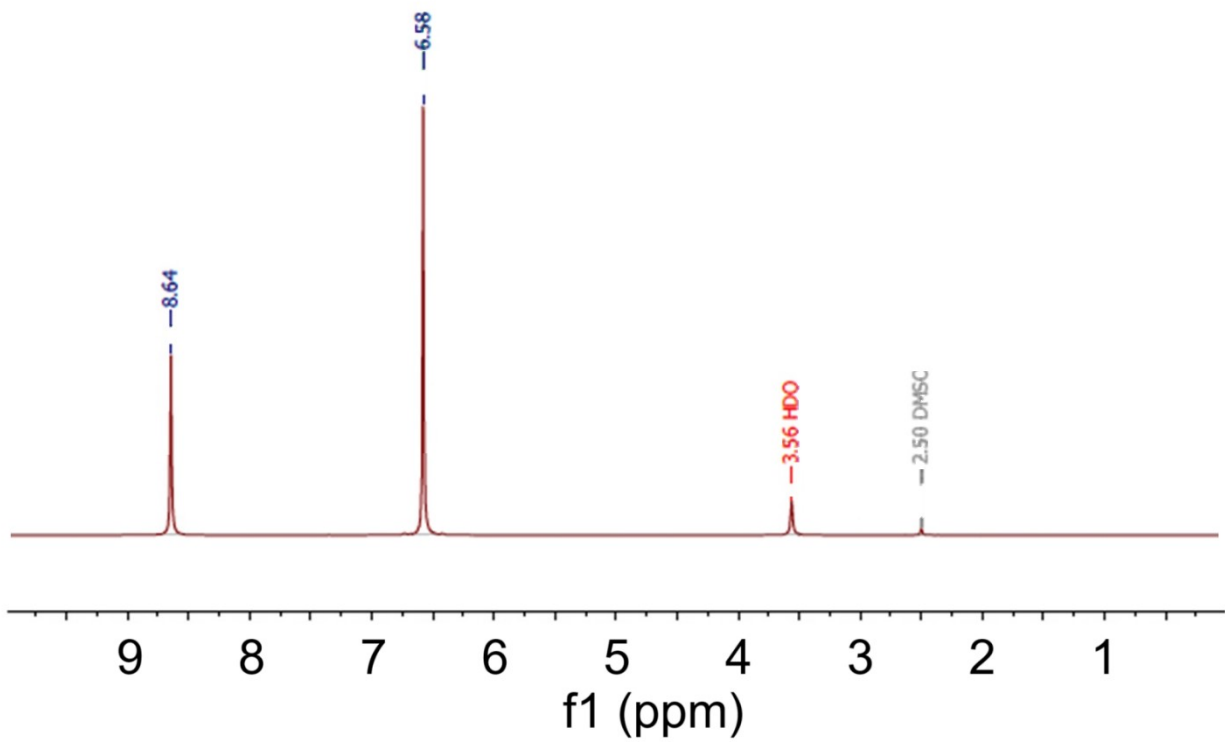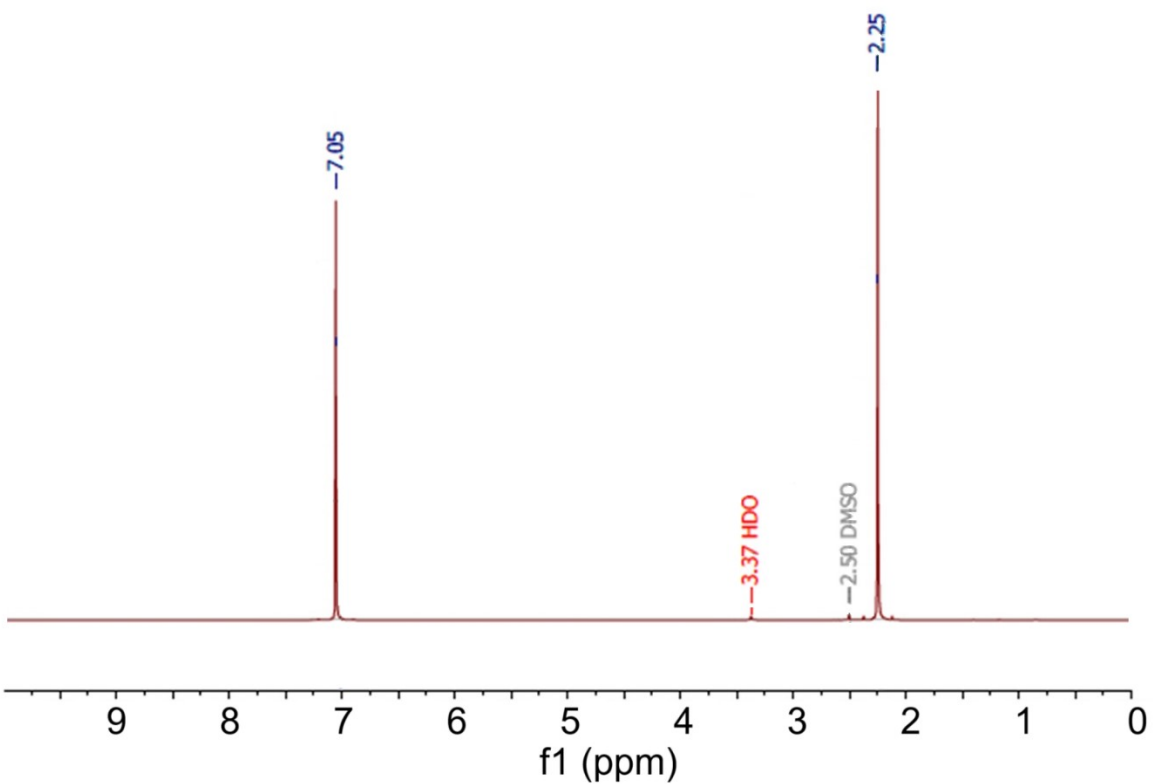

**Figure S5:** NMR spectra of starting materials. Top: <sup>1</sup>H NMR spectrum of 1,4-catechol in DMSO-*d*<sub>6</sub>. Bottom: <sup>1</sup>H NMR spectrum of 1,4-xylene in DMSO-*d*<sub>6</sub>.

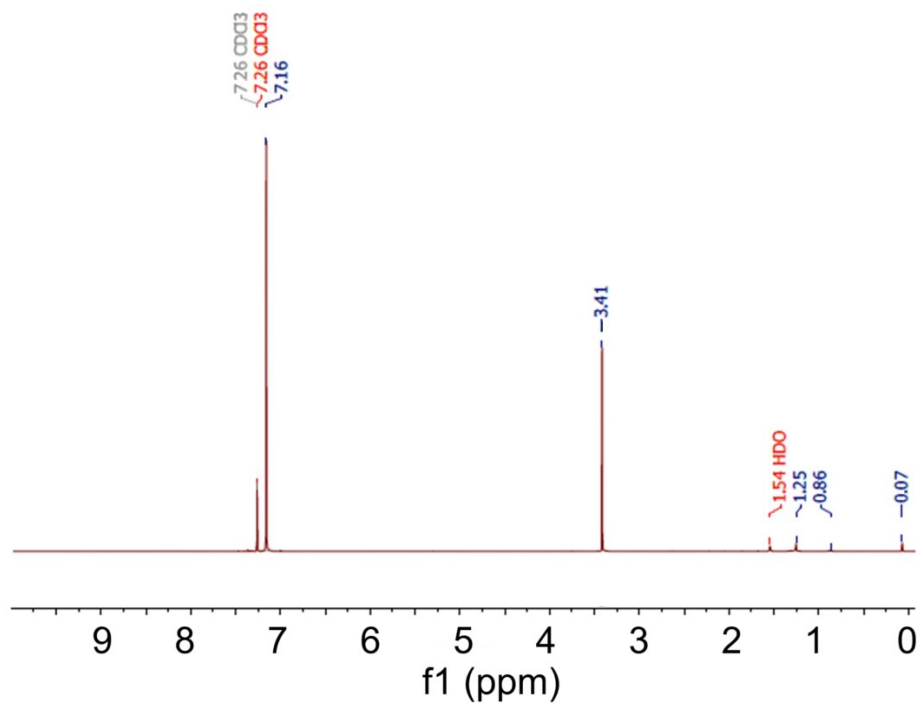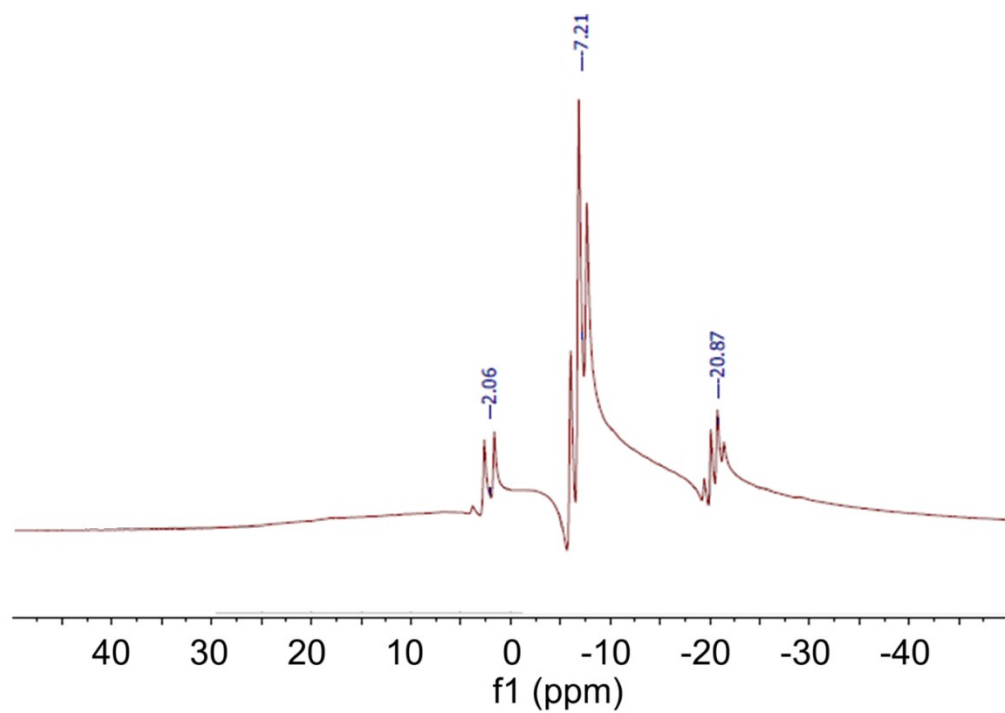

**Figure S5 (cont):** NMR spectra of starting materials. Top: <sup>1</sup>H NMR spectrum of 1,4-dithiobenzene in DCM-*d*. Bottom: <sup>11</sup>B NMR spectrum of BH<sub>2</sub>Cl(SMe<sub>2</sub>) in THF.

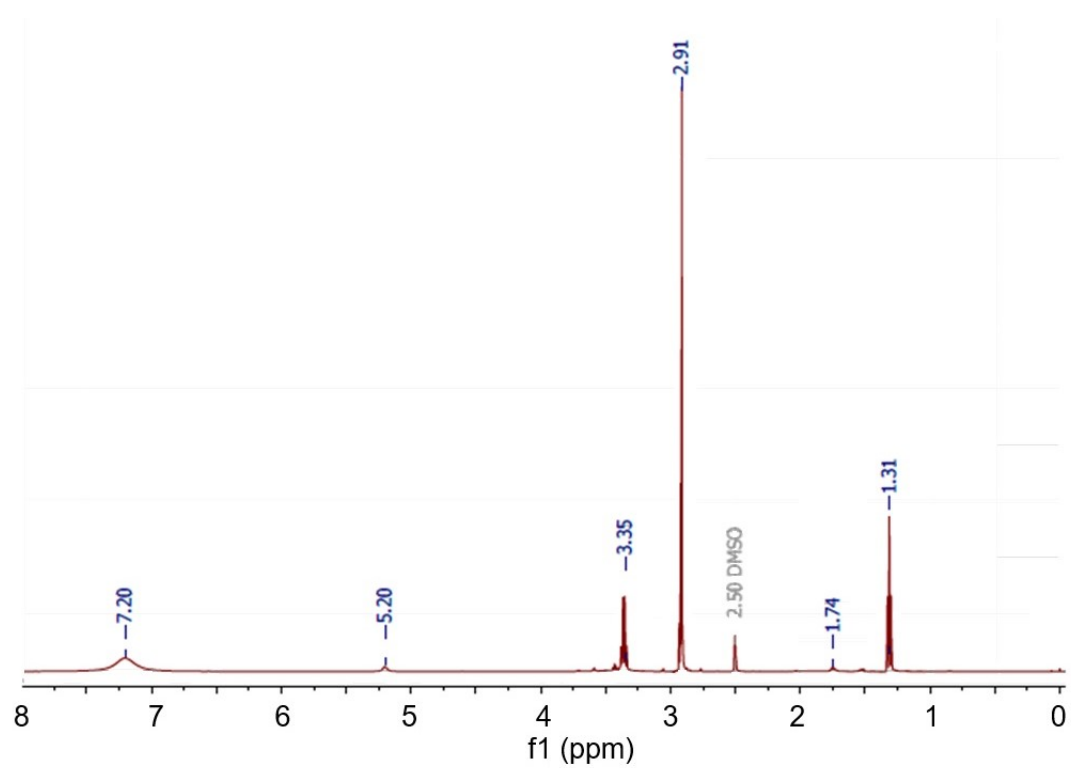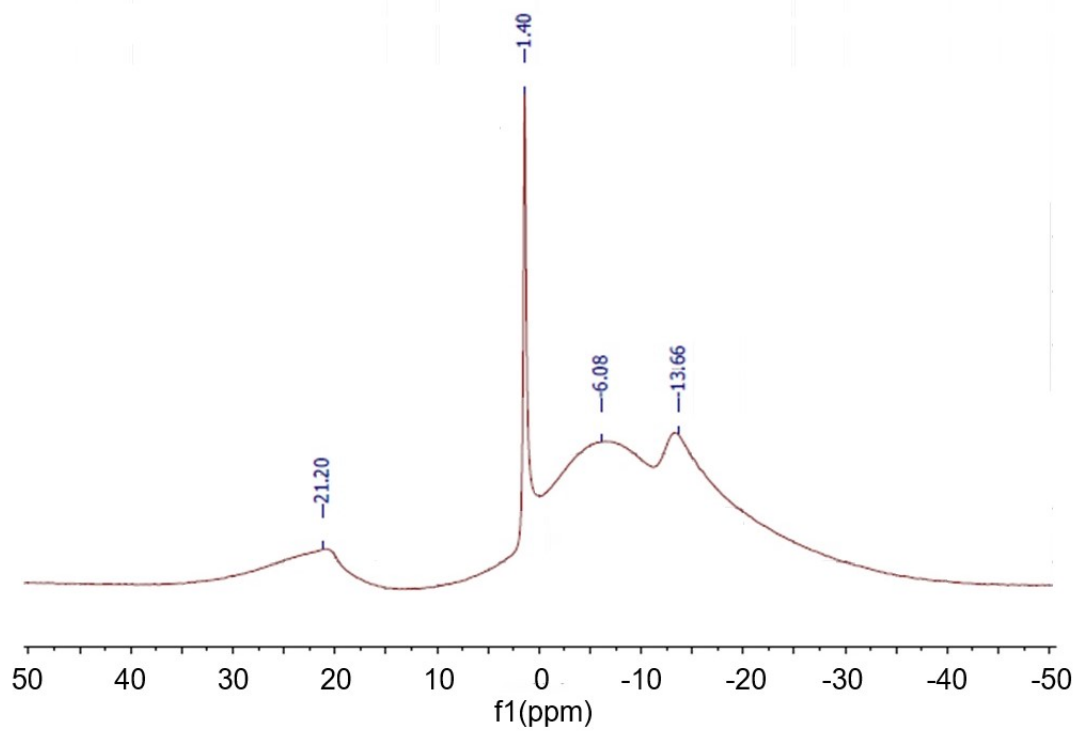

**Figure S6:**  $^1\text{H-NMR}$  (top) and  $^{11}\text{B NMR}$  (bottom) of Catechol Borohydride Polymer **3-O**.

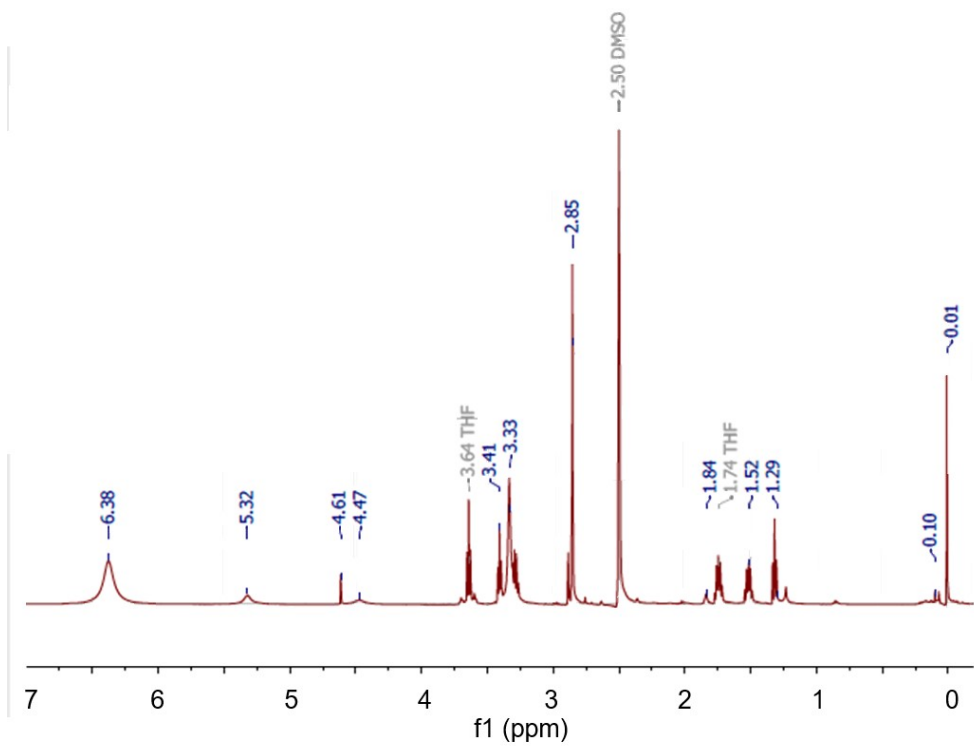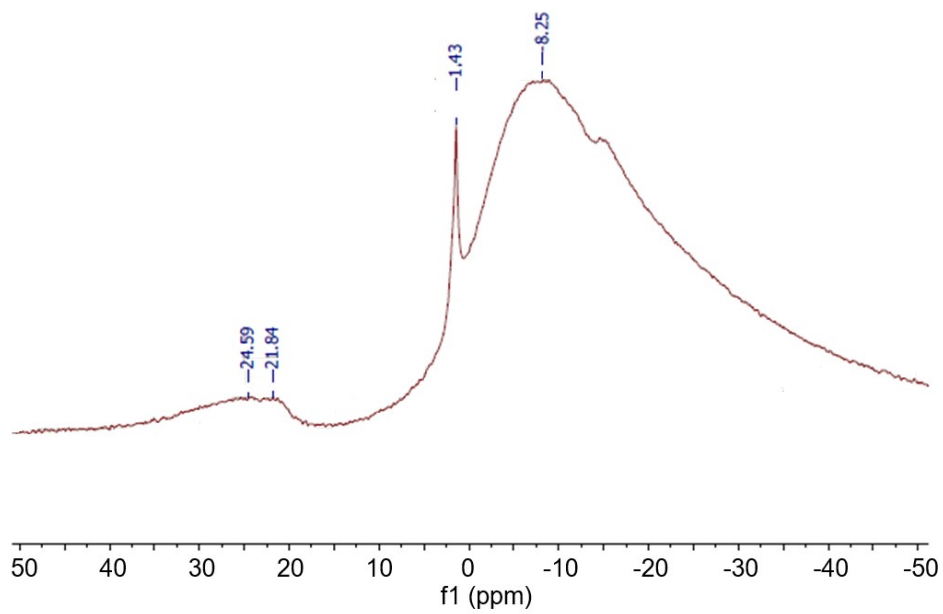

Figure S7.  $^1\text{H}$ -NMR (top) and  $^{11}\text{B}$  NMR (bottom) of 3-S.

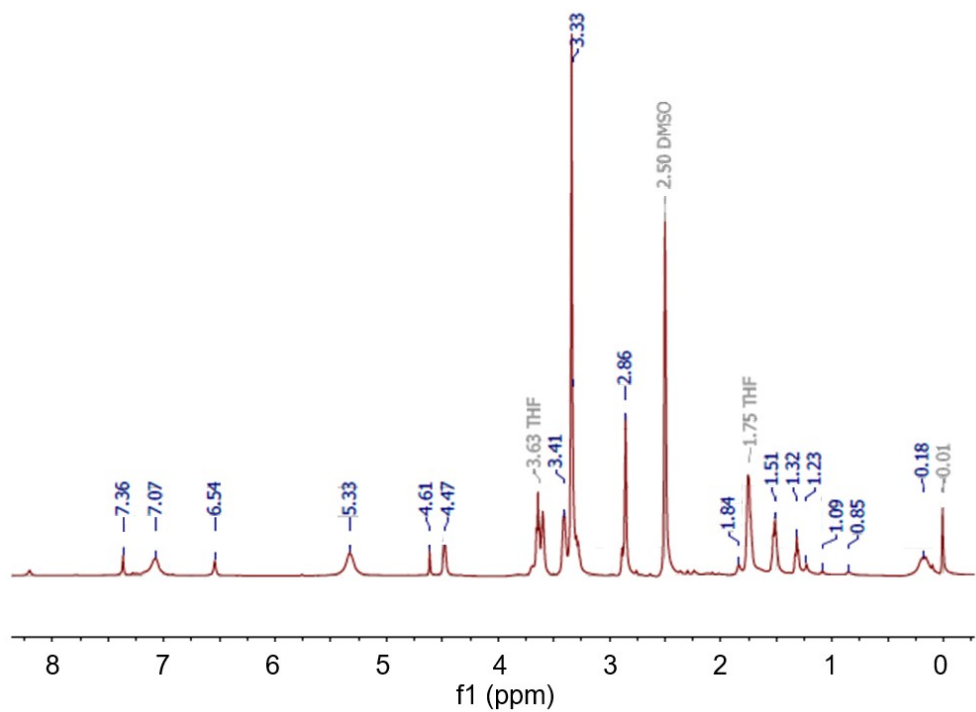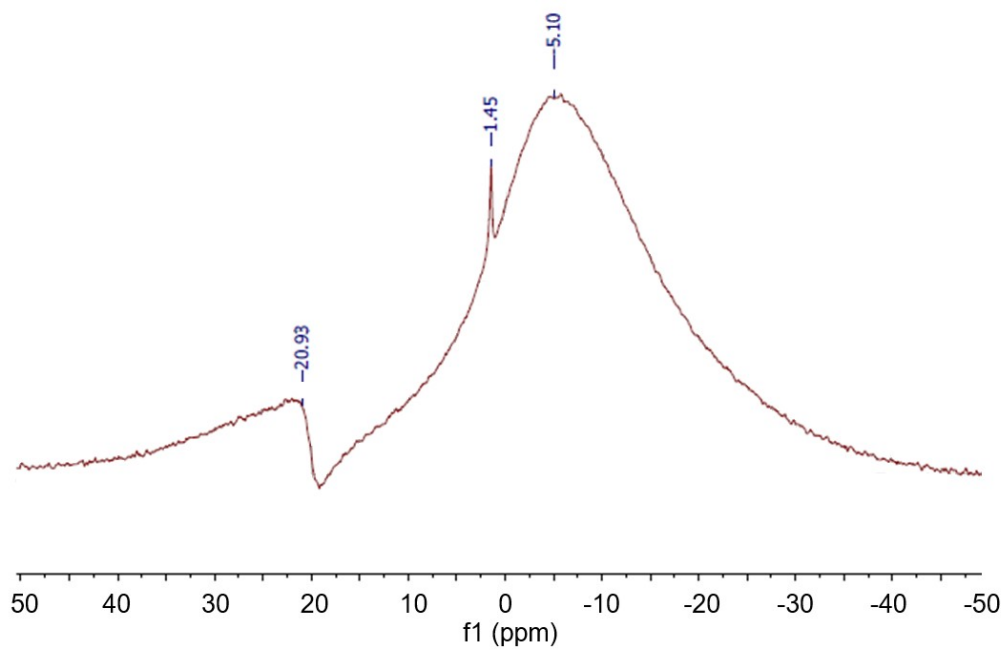

Figure S8. <sup>1</sup>H-NMR (top) and <sup>11</sup>B NMR (bottom) of 3-CH<sub>2</sub>.

# GPC

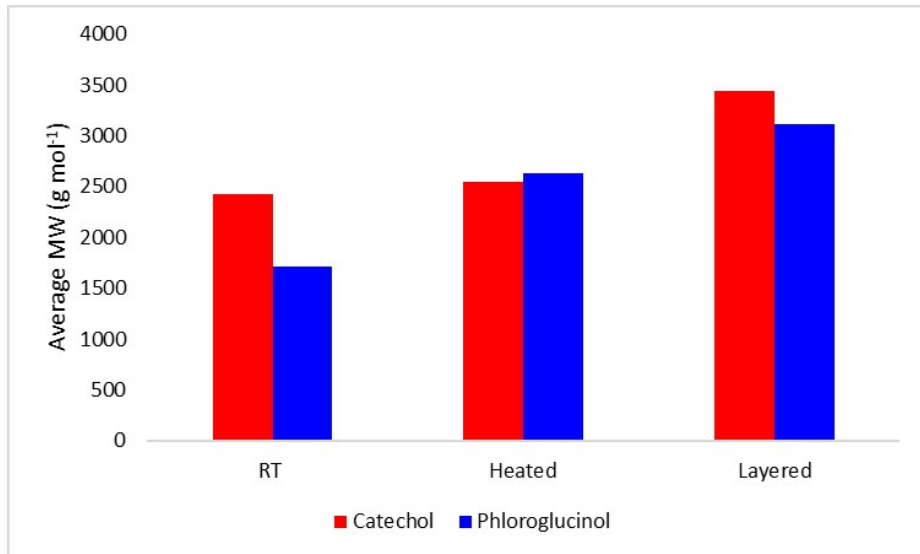

**Figure S9.** Comparison of Average Molecular Weights of catechol based (**3-O**) and Phloroglucinol-based (**4-O**) borohydride polymers prepared using different synthetic approaches.

|                       | <i>Reaction Conditions</i> | <i>Molecular Formula for Polymer Unit</i>                        | <i>Molecular Weight for Unit (g·mol<sup>-1</sup>)</i> | <i>GPC Calculated MW</i> | <i>Approximate Number of Repeating Units</i> |
|-----------------------|----------------------------|------------------------------------------------------------------|-------------------------------------------------------|--------------------------|----------------------------------------------|
| <i>Catechol</i>       | RT                         | -BH <sub>2</sub> OC <sub>6</sub> H <sub>4</sub> O-               | 127.85                                                | 2428                     | 19                                           |
|                       | Heated                     |                                                                  |                                                       | 2550                     | 20                                           |
|                       | Layered                    |                                                                  |                                                       | 3439                     | 27                                           |
| <i>Phloroglucinol</i> | RT                         | -BH <sub>2</sub> OC <sub>6</sub> H <sub>3</sub> O <sub>2</sub> - | 142.83                                                | 1708                     | 12                                           |
|                       | Heated                     |                                                                  |                                                       | 2633                     | 18                                           |
|                       | Layered                    |                                                                  |                                                       | 3119                     | 22                                           |

**Table S3:** Comparison of Catechol and Phloroglucinol GPC

Calculated Molecular Weights and Approximate Number of Repeating Units

# Thermal Analysis

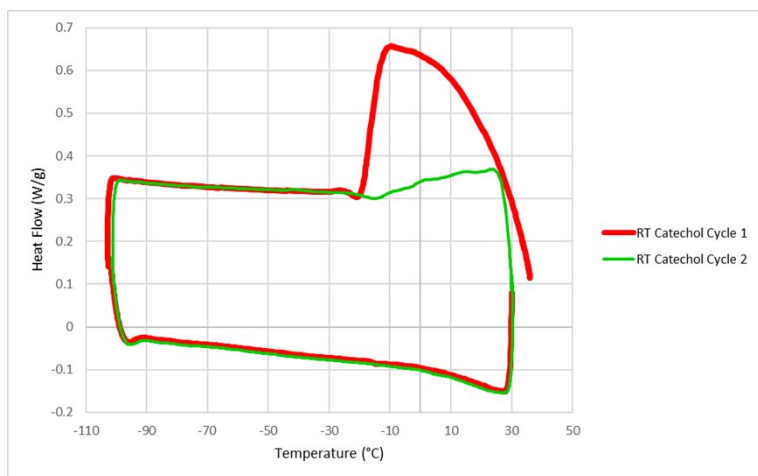

**Figure S10:** DSC of Room Temperature-dried Catechol Borohydride Polymer **3-O**.

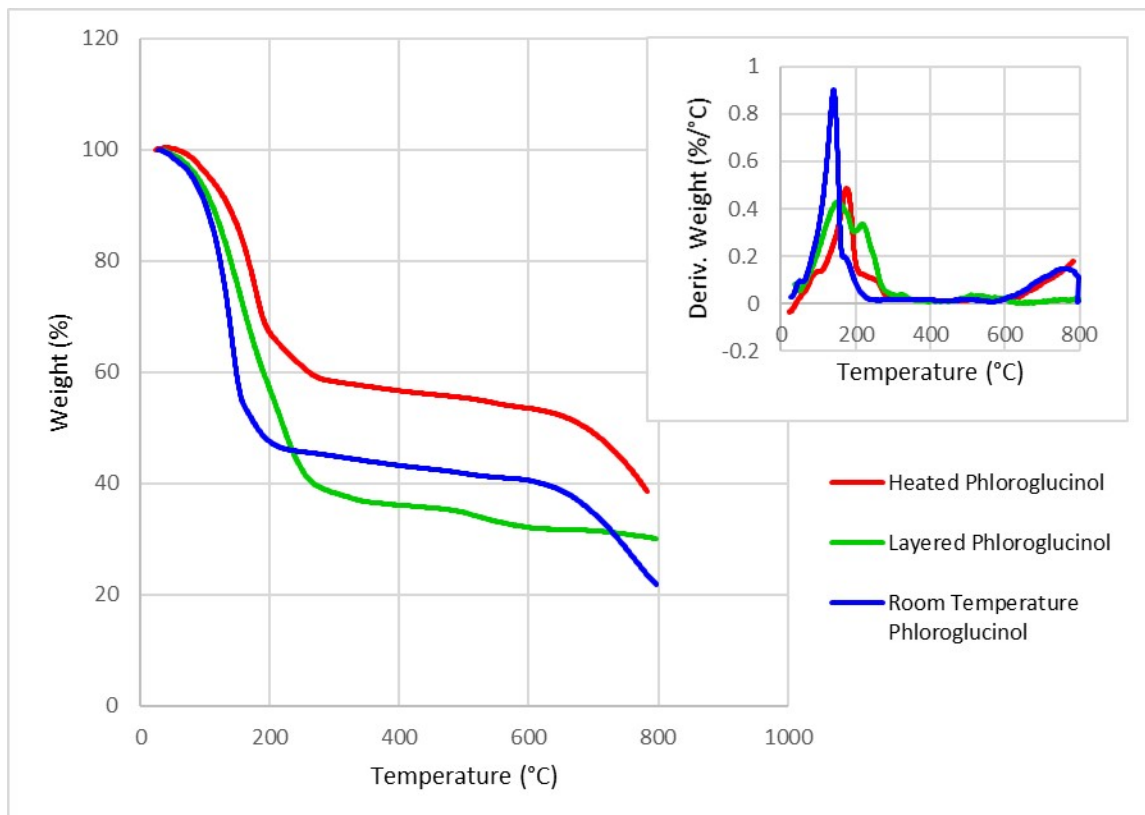

**Figure S11** TGA of **3-O** from various reaction conditions, Inset: First derivative plots.

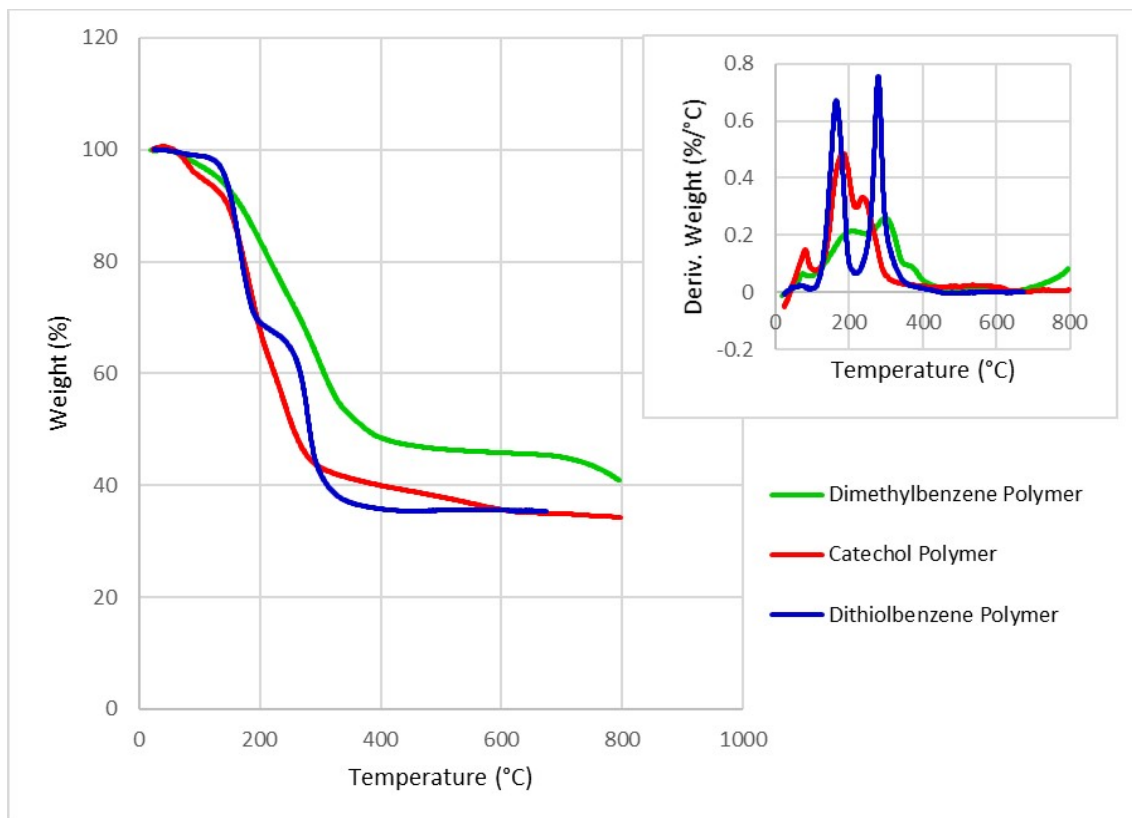

**Figure S12.** Comparison of TGA from **3-O**, **3-S**, and **3-CH<sub>2</sub>** Inset: First derivative plots.



# Electrochemical Impedance Spectroscopy

| <i>Polymer</i>          | <i>Method</i>              | <i>Ionic Conductivity<br/>(S·cm<sup>-1</sup>)<br/>60°C   10°C (*20°C)</i>                            | <i>Sample<br/>Thickness<br/>(cm)</i> | <i>Activation<br/>Energy<br/>(kJ·mol<sup>-1</sup>)<br/>Cool   Heat</i> |
|-------------------------|----------------------------|------------------------------------------------------------------------------------------------------|--------------------------------------|------------------------------------------------------------------------|
| <b>3-O</b>              | Vacuum Only<br>Heat & Vac. | 3.7 x 10 <sup>-7</sup>   1.5 x 10 <sup>-8</sup> *<br>2.2 x 10 <sup>-5</sup>   1.5 x 10 <sup>-8</sup> | 0.010<br>0.006                       | 110   120<br>110   115                                                 |
| <b>4-O</b>              | Heat & Vac.                | 1.1 x 10 <sup>-7</sup>   7.9 x 10 <sup>-10</sup> *                                                   | 0.005                                | 79   63                                                                |
| <b>3-S</b>              | Heat & Vac.                | 1.4 x 10 <sup>-4</sup>   5.1 x 10 <sup>-8</sup>                                                      | 0.012                                | 120   106                                                              |
| <b>3-CH<sub>2</sub></b> | Heat & Vac.                | 3.9 x 10 <sup>-8</sup>   1.5 x 10 <sup>-10</sup>                                                     | 0.013                                | 88   95                                                                |

**Table S4:** Polymer sample thickness and activation energies

## Nyquist plots

Nyquist plots were fit to the circuit in Figure S12. The bulk ionic conductivity was calculated based on the ohmic resistance found at R<sub>2</sub>. This value is then used in the Arrhenius plots shown in Figure 3 and 4 of the main text to extract temperature-dependent conductivity and to calculate activation energies. Representative Nyquist plots are shown with the circuit fit used; occasionally lower temperatures had to be hand extrapolated due to high levels of noise within the plots. Typically R<sub>2</sub> was the bulk resistivity component for the polymer electrolytes tested Nyquist plots of samples at the different temperatures are also given as raw data. For samples fit or within the same general grouping are shown within the matching Appendix subsection. A description of the data is shown below the plots.

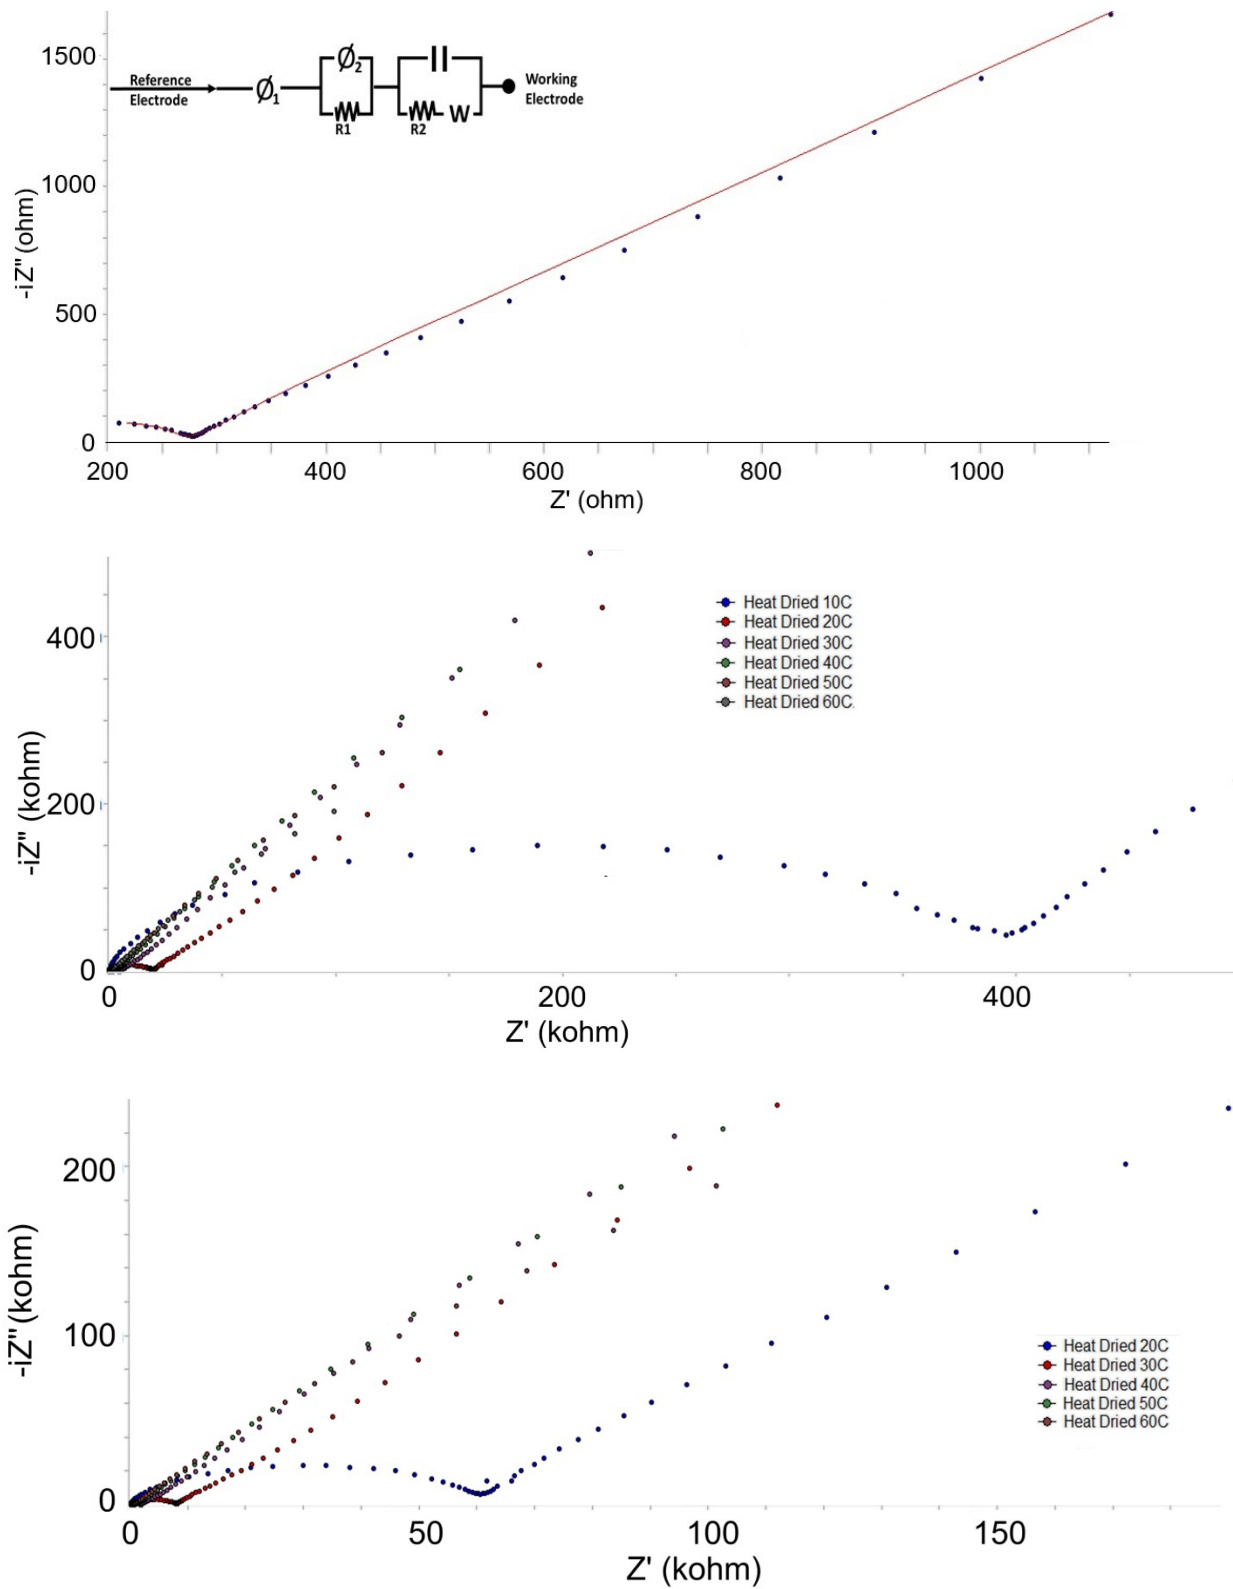

**Figure S13.** Heat and Vacuum Dried 3-O Polymer at 60°C The data curves are catechol borohydride polymer heat and vacuum dried samples showing the cooling and heating cycle.

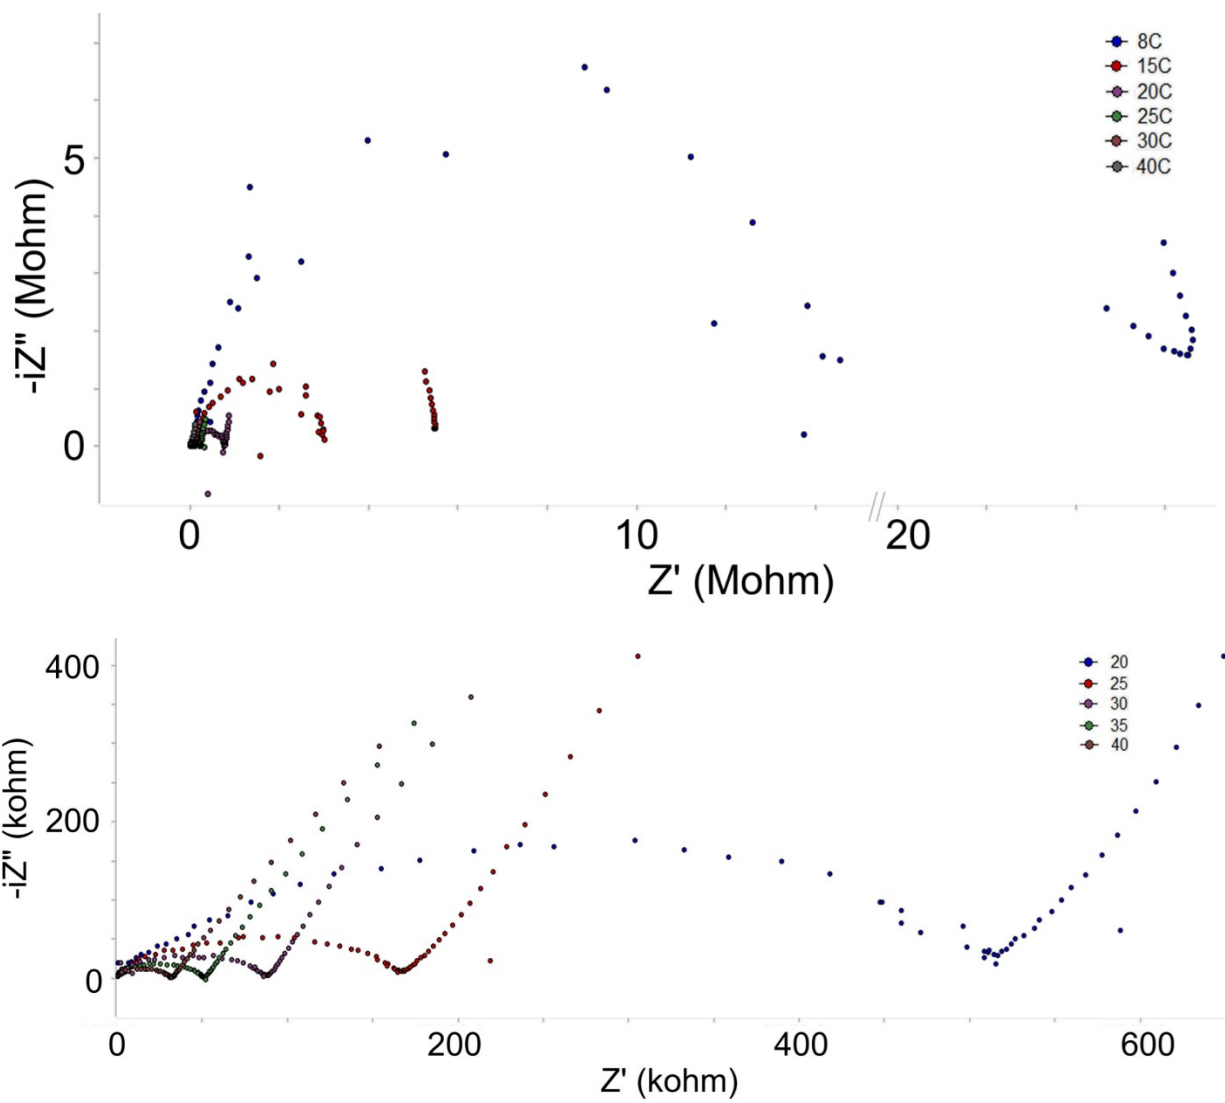

**Figure S14.** Nyquist plots of **3-O**. The data curves are catechol borohydride polymer vacuum dried only samples showing the cooling and heating cycles.

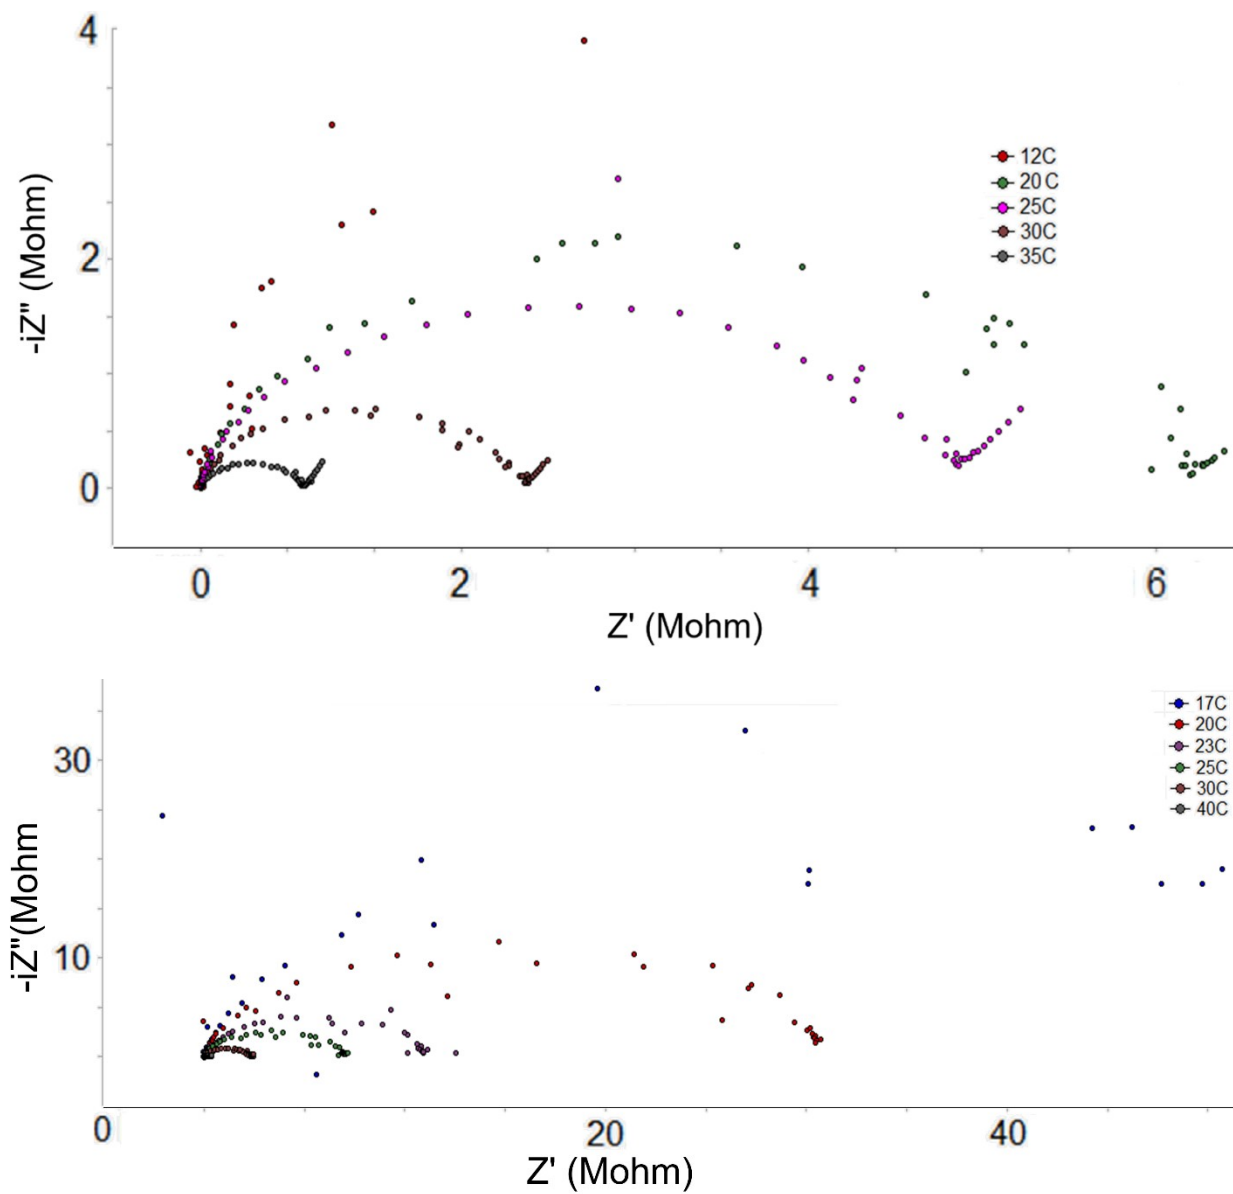

**Figure S15.** 3-O polymer. The data curves are catechol borohydride polymer vacuum dried only samples showing the cooling and heating cycle.

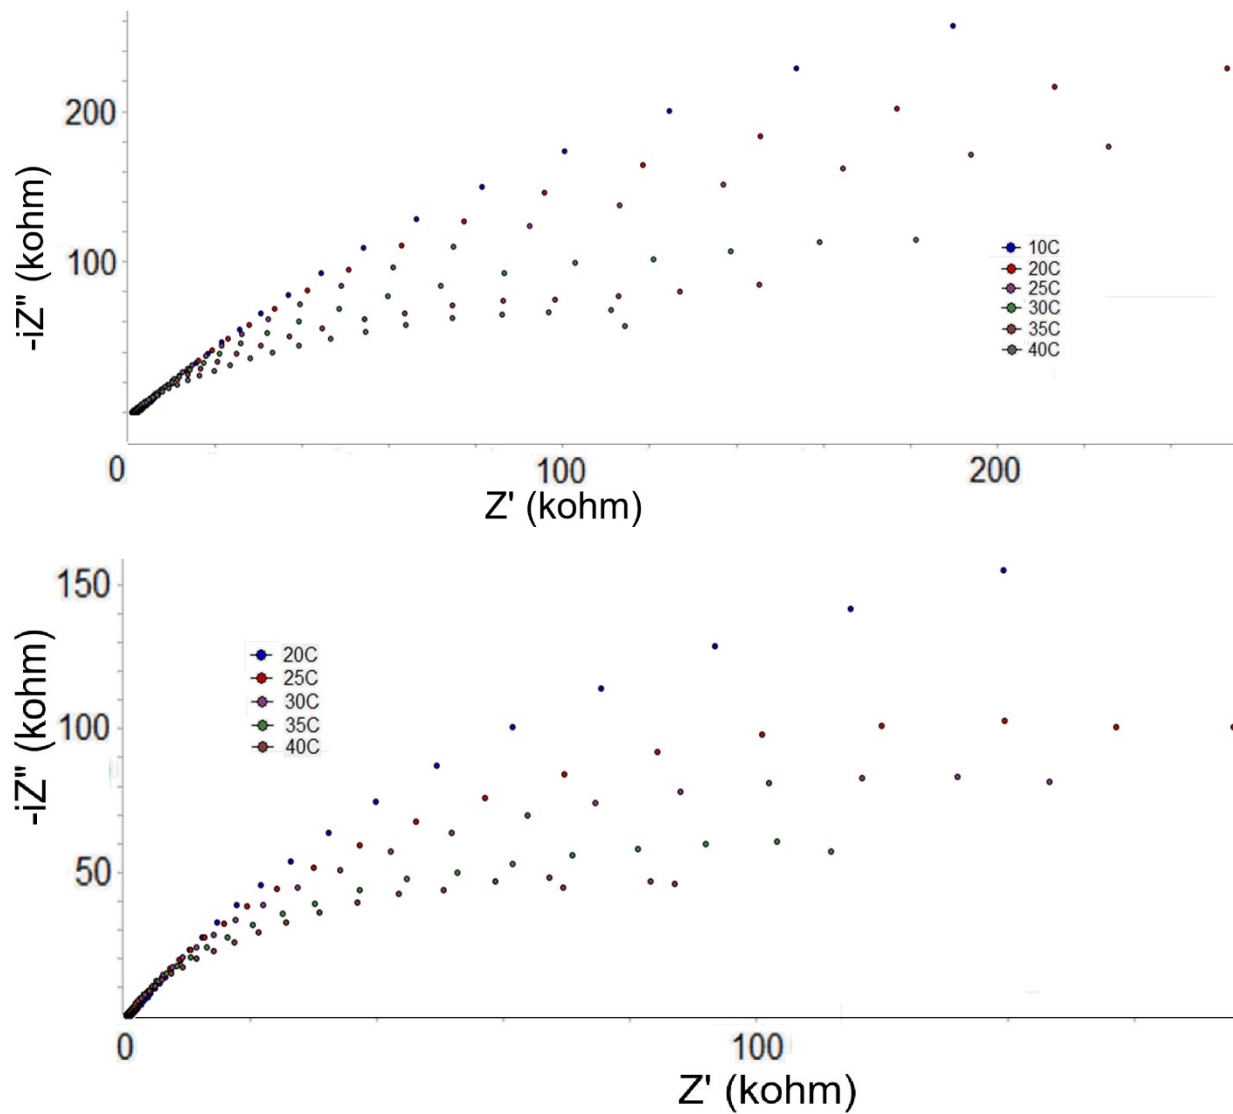

**Figure S16. 3-O.** The data curves are samples that were prepared by vacuum drying the catechol borohydride polymer when still suspended in solution onto a glass fiber to compare polymer EIS with an inert matrix for cooling and heating cycles.

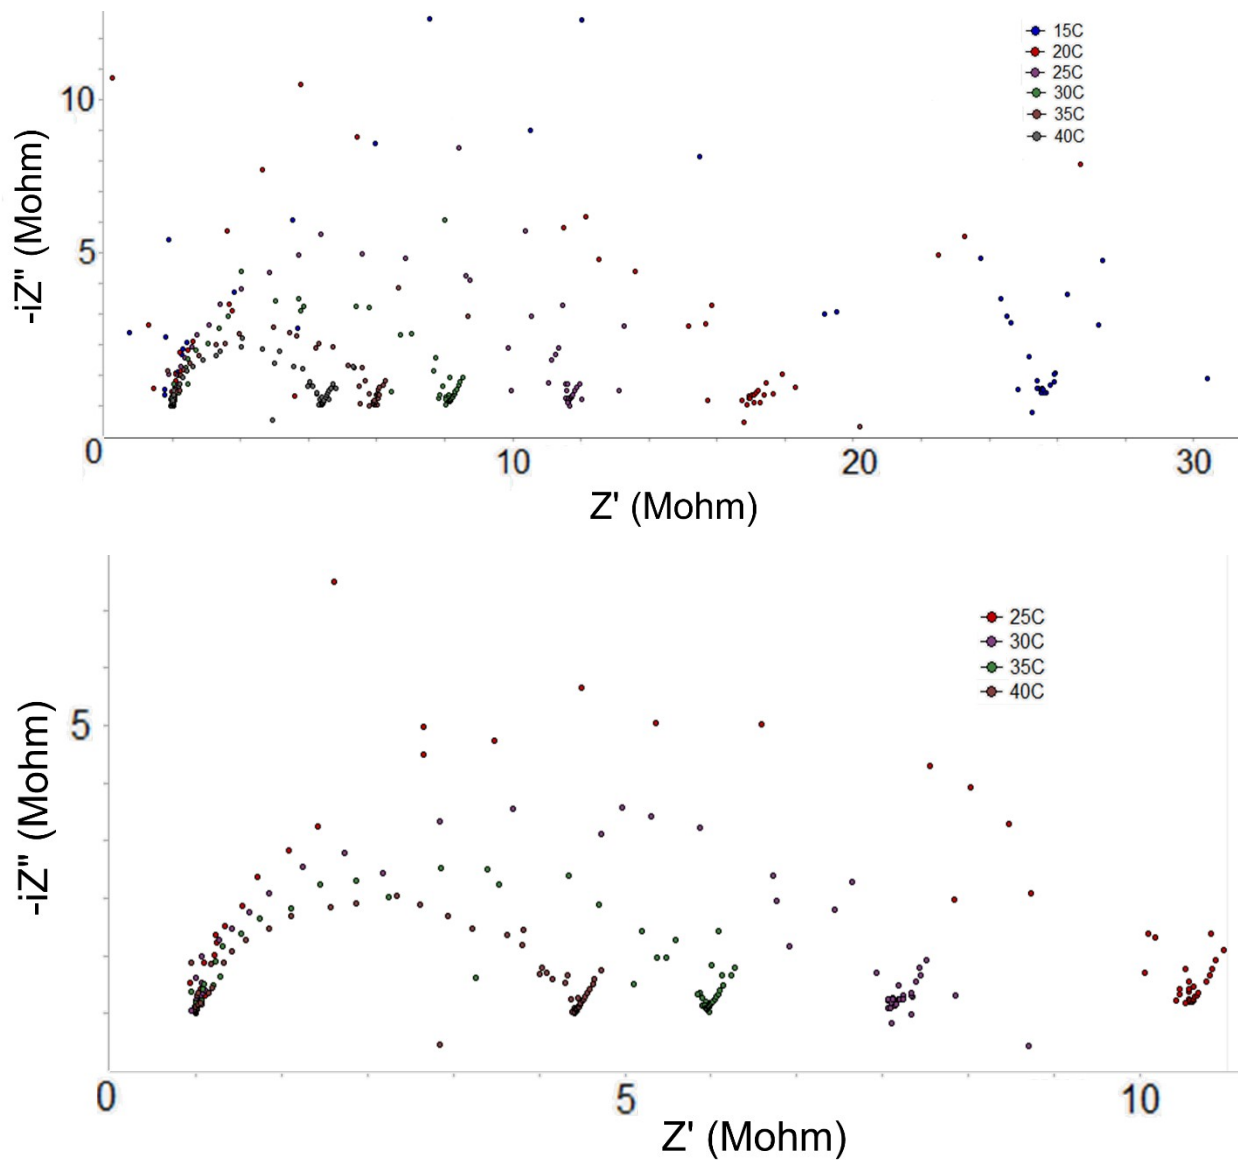

**Figure S17- 3-O.** The data curves are samples that were prepared by vacuum drying the catechol borohydride polymer when still suspended in solution onto a glass fiber to compare polymer EIS with an inert matrix for cooling and heating cycles.

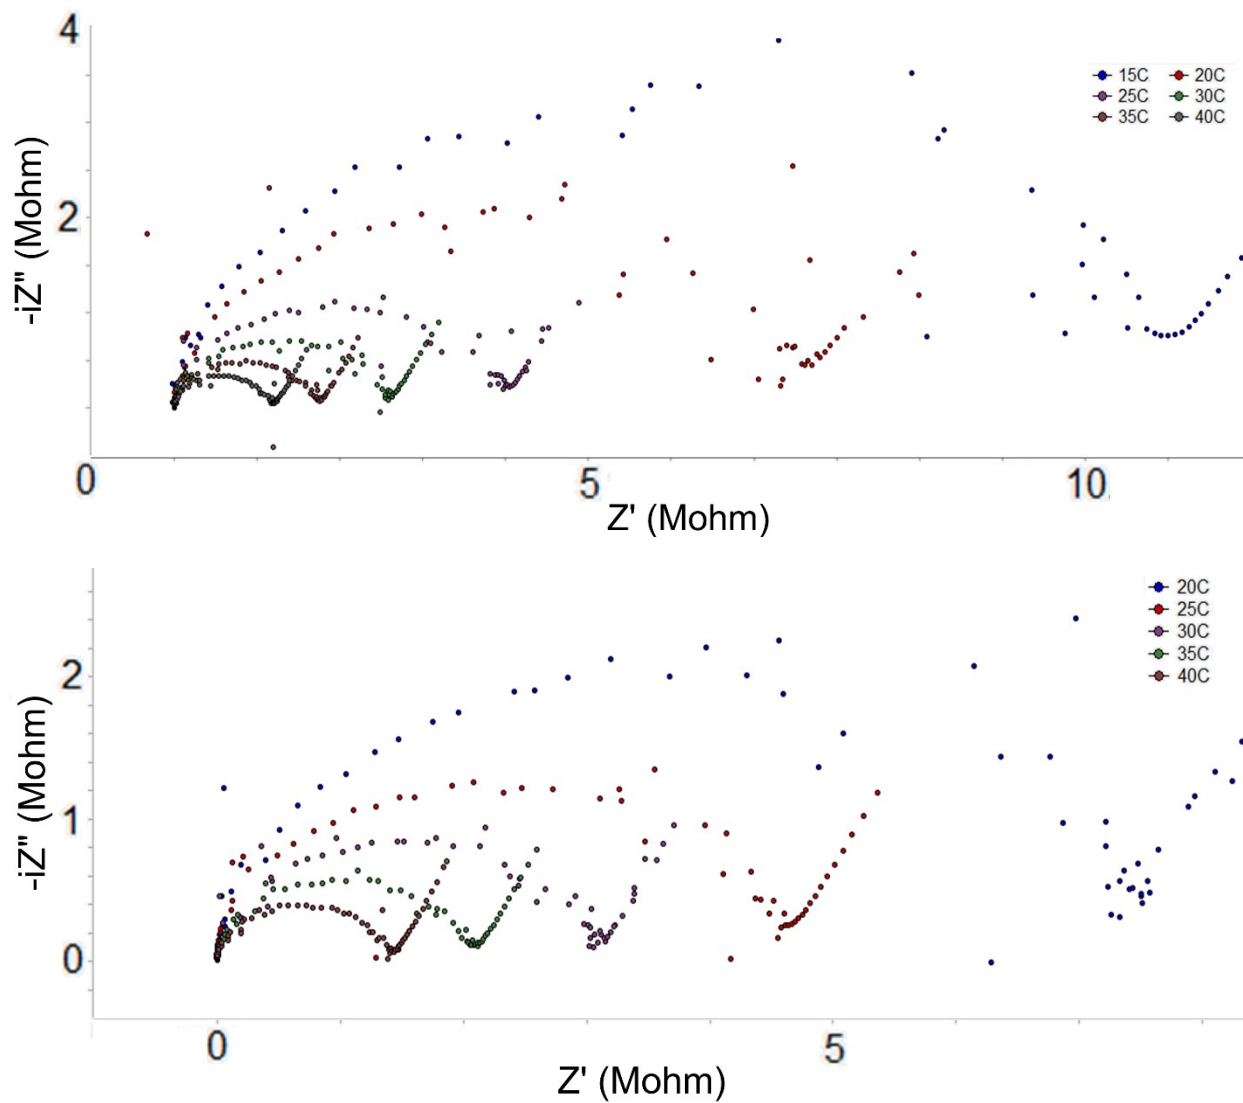

**Figure S18. 3-O.** The data curves are catechol borohydride polymer incorporated with lithium tetraphenylborate x 4THF and vacuum dried onto a glass fiber for cooling and heating cycles.

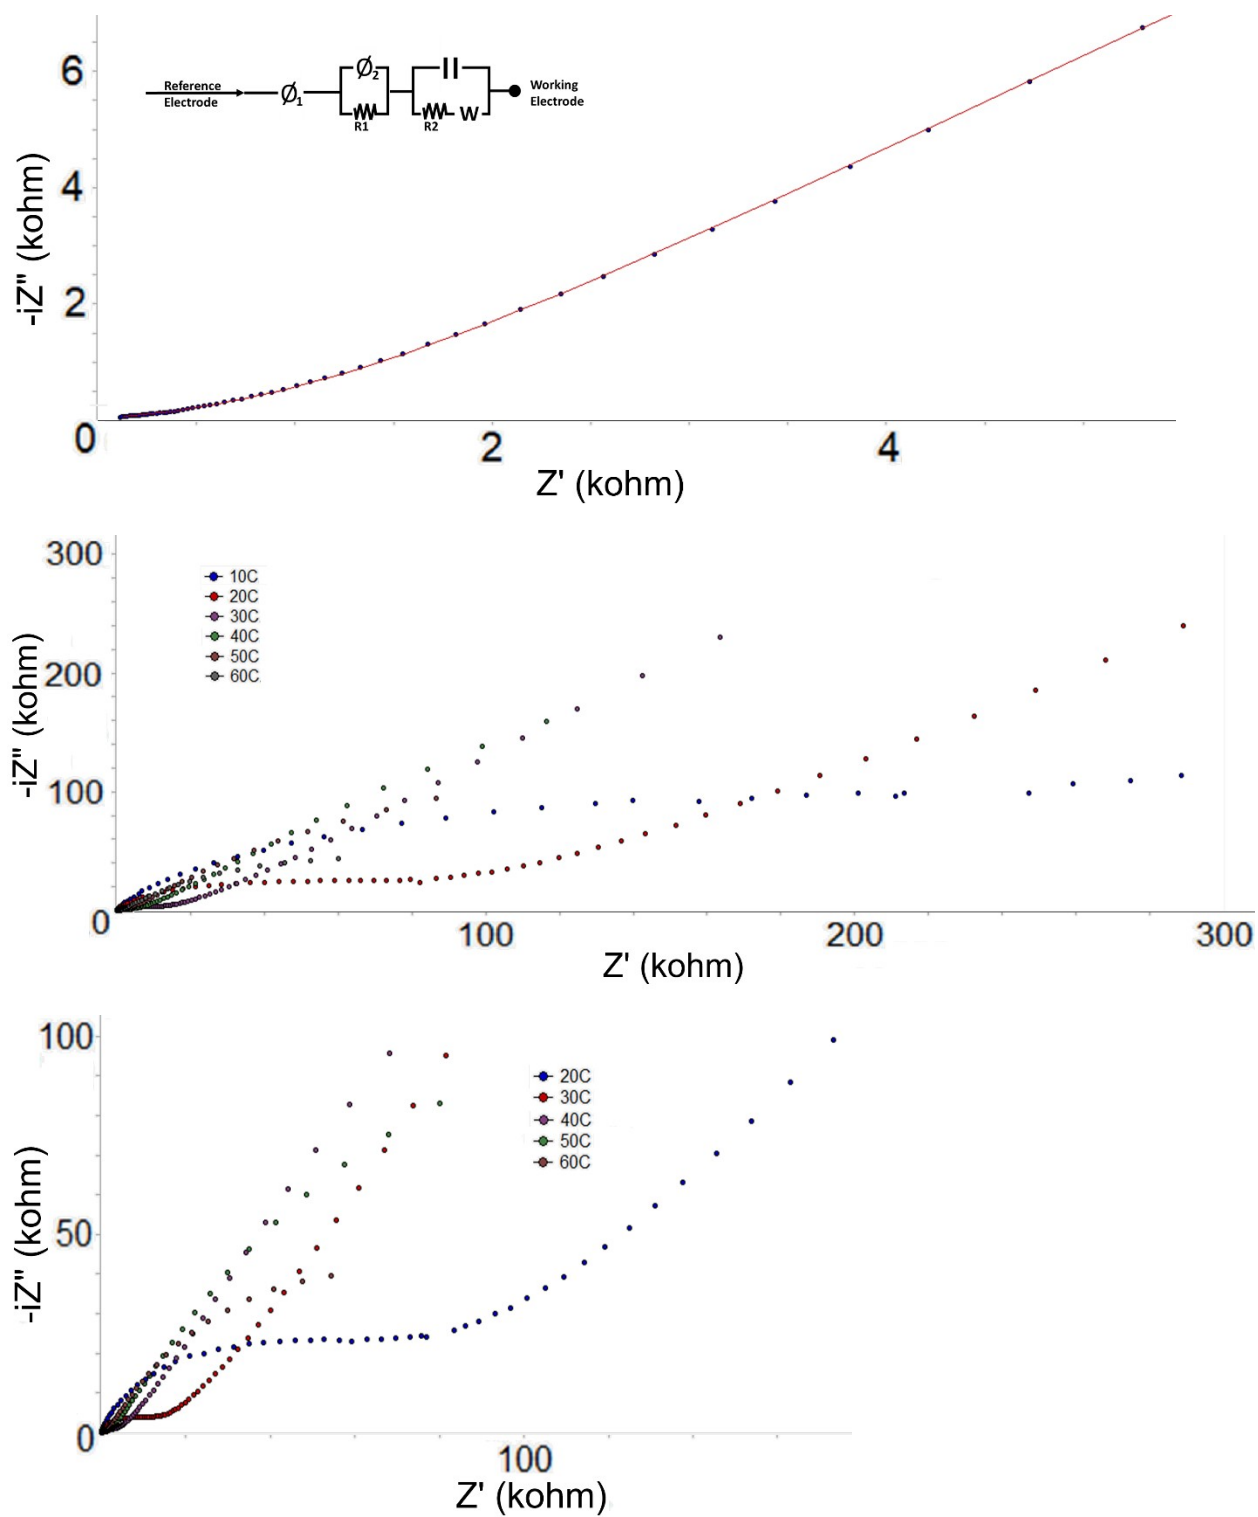

**Figure S19. 3-S.** The data curves are dithiobenzene borohydride polymer heat and vacuum dried sample for cooling and heating cycles.



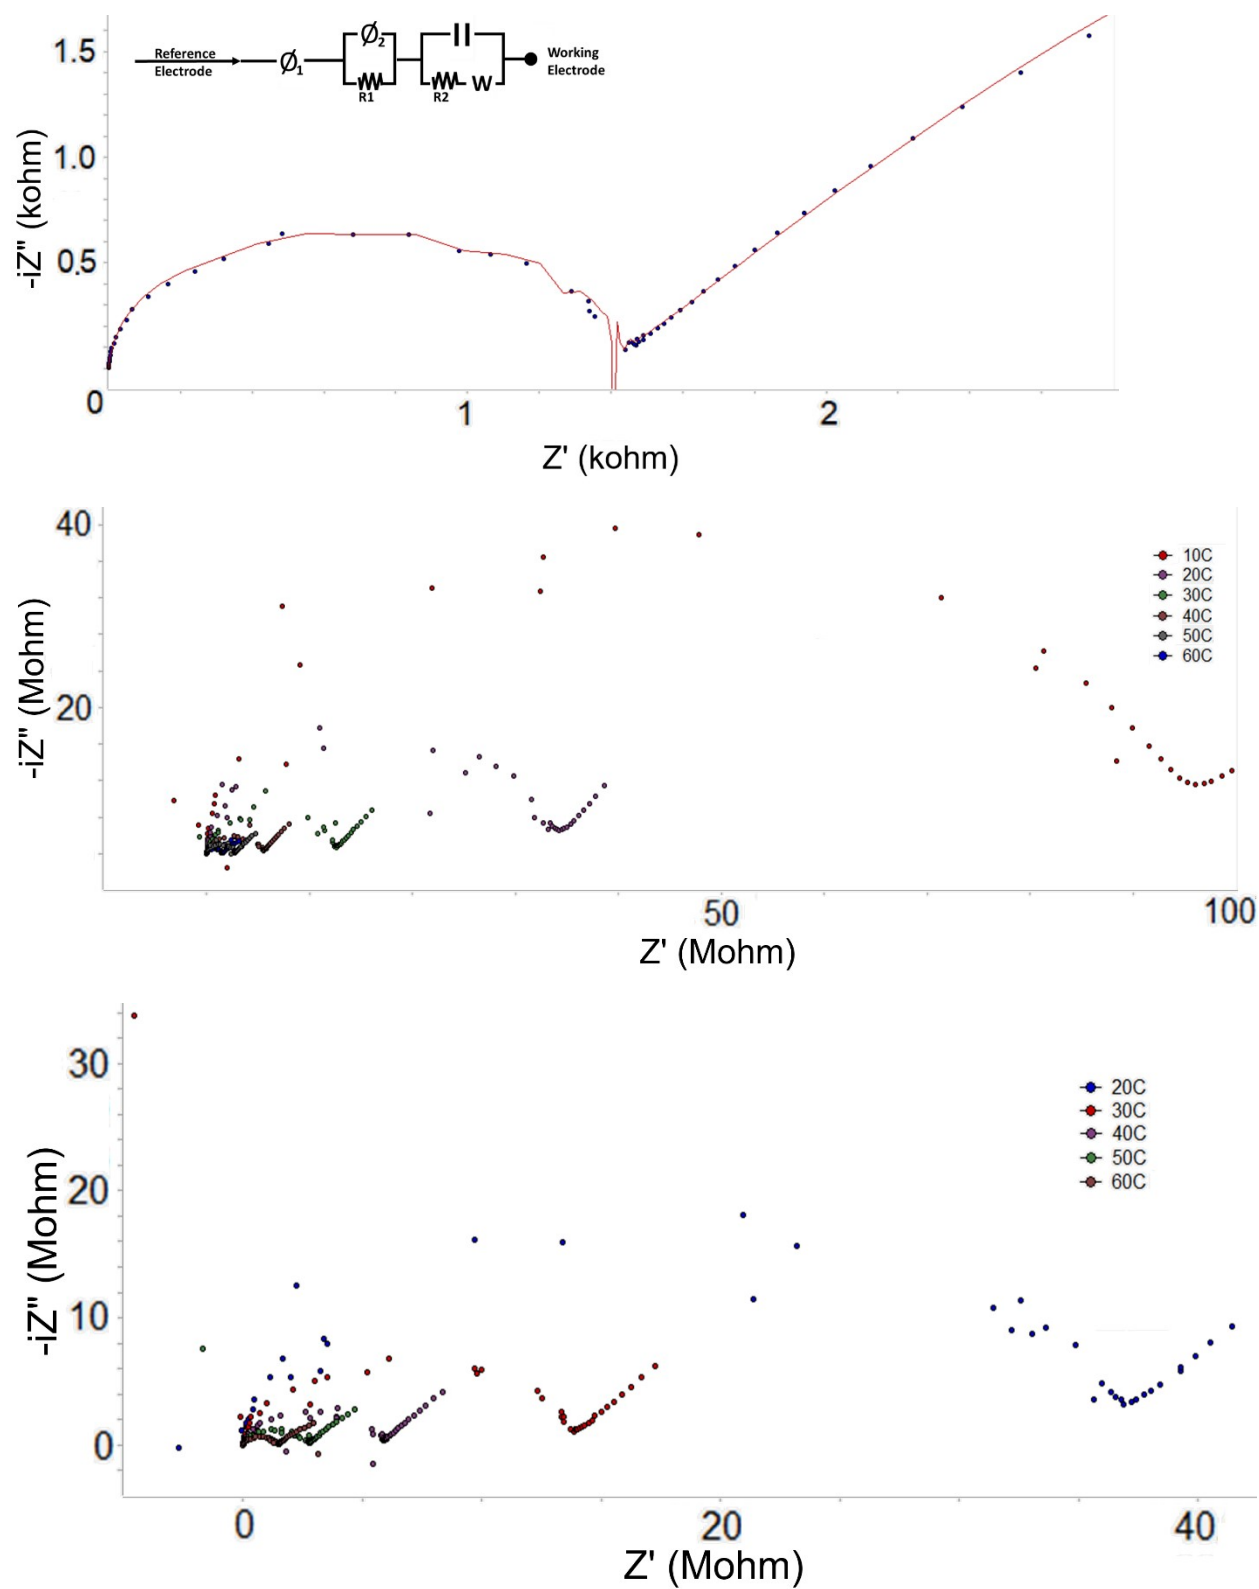

**Figure S20. 3-CH<sub>2</sub>.** The data curves are dimethylbenzene borohydride polymer heat and vacuum dried sample for cooling and heating cycles.

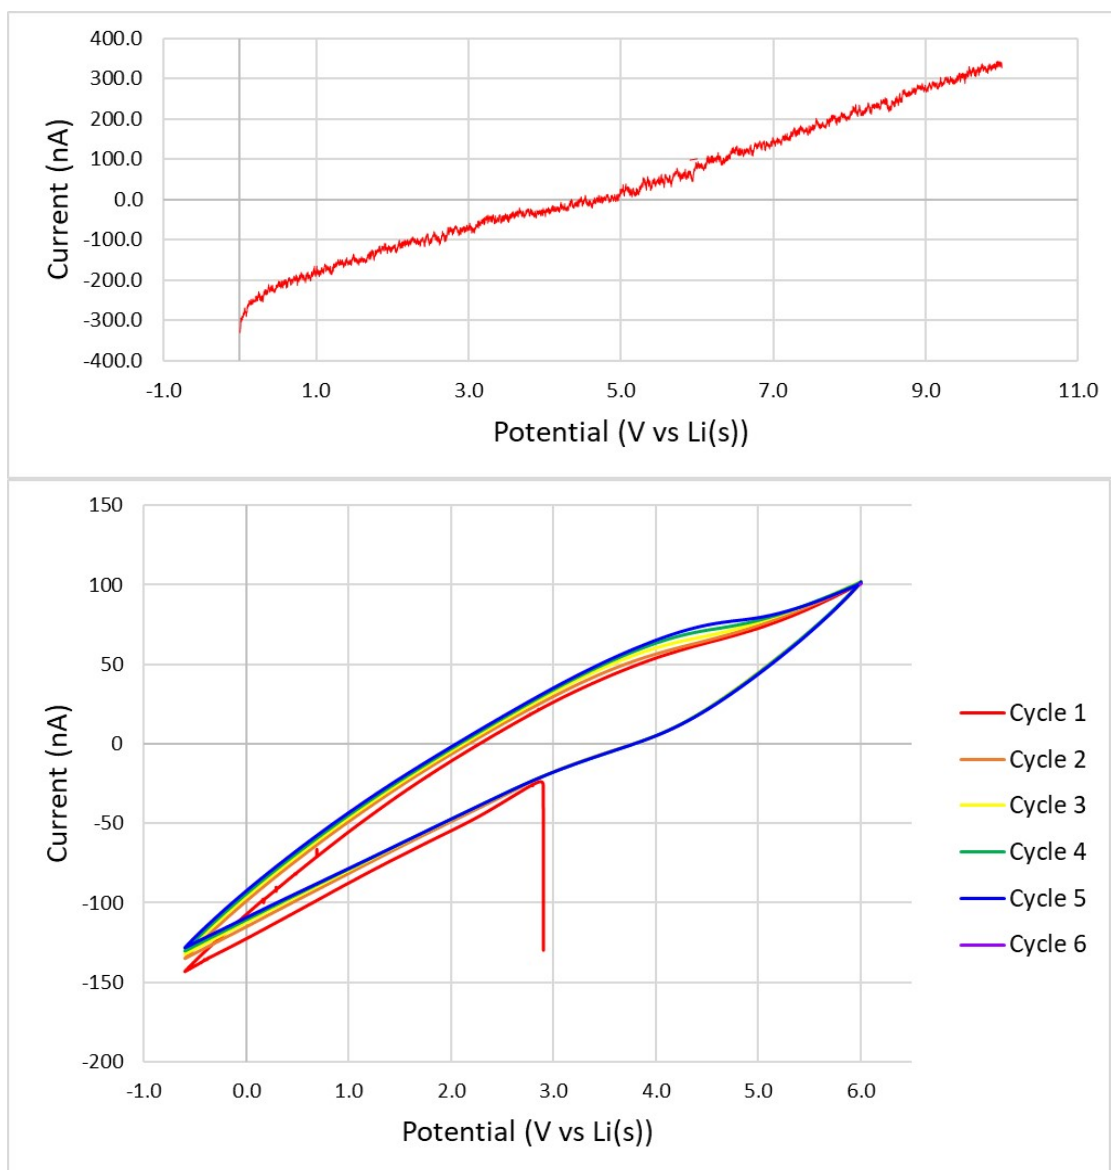

**Figure S21.** Voltammetry of **3-O** with Li(s) reference electrode. Top: Linear Sweep voltammetry. Bottom Cyclic Voltammetry (6 cycles). No SEI or lithium plating/stripping waves are observed, and very low current. Inactivity is attributed to decomposition of the electrolyte at Li(s).

# Crystallographic Tables

$C_{58}H_{66}B_2Li_2O_6$  (**3-M**)

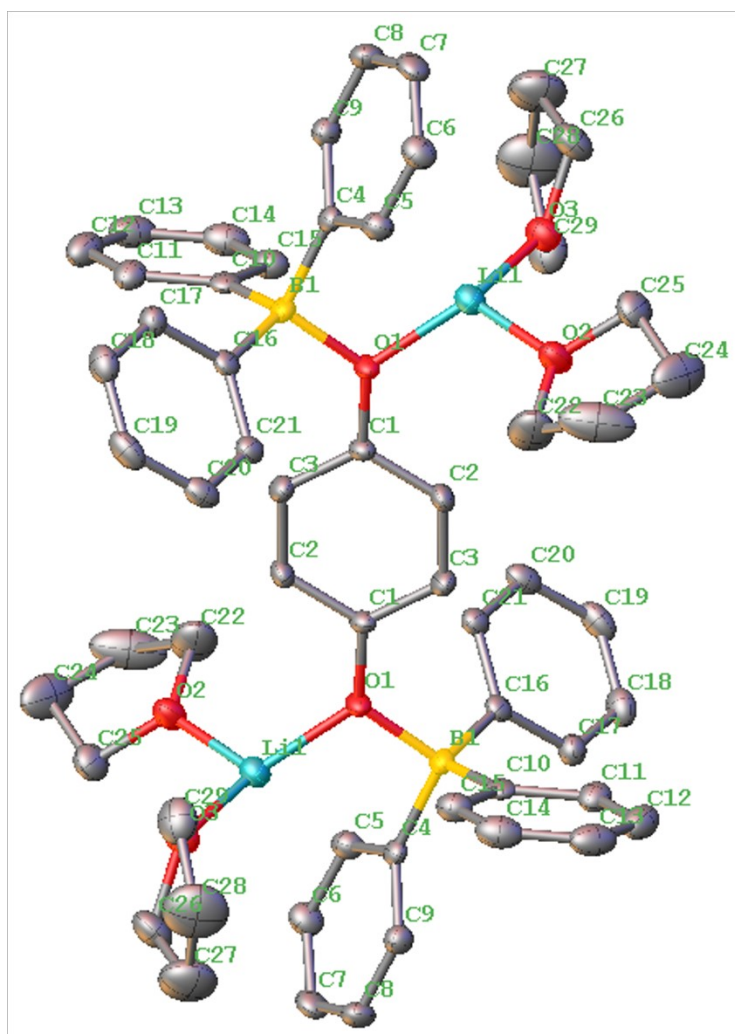

**Figure S22.** Thermal ellipsoid plot of **3-M** with labels. Hydrogen atoms omitted for clarity.

**Table S5 Crystal data and structure refinement for 3-M.**

---

|                                             |                                                                               |
|---------------------------------------------|-------------------------------------------------------------------------------|
| Identification code                         | 3-M                                                                           |
| Empirical formula                           | C <sub>58</sub> H <sub>66</sub> B <sub>2</sub> Li <sub>2</sub> O <sub>6</sub> |
| Formula weight                              | 894.60                                                                        |
| Temperature/K                               | 99.96                                                                         |
| Crystal system                              | monoclinic                                                                    |
| Space group                                 | P2 <sub>1</sub> /n                                                            |
| a/Å                                         | 9.9479(4)                                                                     |
| b/Å                                         | 10.2280(5)                                                                    |
| c/Å                                         | 24.8303(11)                                                                   |
| α/°                                         | 90                                                                            |
| β/°                                         | 90.7700(10)                                                                   |
| γ/°                                         | 90                                                                            |
| Volume/Å <sup>3</sup>                       | 2526.2(2)                                                                     |
| Z                                           | 2                                                                             |
| ρ <sub>calc</sub> /cm <sup>3</sup>          | 1.176                                                                         |
| μ/mm <sup>-1</sup>                          | 0.073                                                                         |
| F(000)                                      | 956.0                                                                         |
| Crystal size/mm <sup>3</sup>                | 0.188 × 0.085 × 0.065                                                         |
| Radiation                                   | MoKα (λ = 0.71073)                                                            |
| 2θ range for data collection/°              | 3.28 to 53.86                                                                 |
| Index ranges                                | -12 ≤ h ≤ 12, -12 ≤ k ≤ 12, -31 ≤ l ≤ 31                                      |
| Reflections collected                       | 33463                                                                         |
| Independent reflections                     | 4904 [R <sub>int</sub> = 0.0427, R <sub>sigma</sub> = 0.0411]                 |
| Data/restraints/parameters                  | 4904/0/307                                                                    |
| Goodness-of-fit on F <sup>2</sup>           | 1.030                                                                         |
| Final R indexes [I ≥ 2σ (I)]                | R <sub>1</sub> = 0.0467, wR <sub>2</sub> = 0.1006                             |
| Final R indexes [all data]                  | R <sub>1</sub> = 0.0821, wR <sub>2</sub> = 0.1162                             |
| Largest diff. peak/hole / e Å <sup>-3</sup> | 0.47/-0.34                                                                    |

---

**Table S6 Bond Lengths for 3-M.**

| Atom | Atom            | Length/Å   | Atom | Atom | Length/Å |
|------|-----------------|------------|------|------|----------|
| O1   | C1              | 1.3724(19) | C10  | C11  | 1.396(2) |
| O1   | B1              | 1.552(2)   | C10  | C15  | 1.406(2) |
| O1   | Li1             | 1.874(3)   | C10  | B1   | 1.630(3) |
| O2   | C22             | 1.440(2)   | C11  | C12  | 1.392(3) |
| O2   | C25             | 1.442(2)   | C12  | C13  | 1.379(3) |
| O2   | Li1             | 1.900(3)   | C13  | C14  | 1.381(3) |
| O3   | C26             | 1.441(2)   | C14  | C15  | 1.382(3) |
| O3   | C29             | 1.434(2)   | C16  | C17  | 1.402(2) |
| O3   | Li1             | 1.908(3)   | C16  | C21  | 1.400(2) |
| C1   | C2              | 1.388(2)   | C16  | B1   | 1.627(3) |
| C1   | C3 <sup>1</sup> | 1.389(2)   | C17  | C18  | 1.379(3) |
| C2   | C3              | 1.387(2)   | C18  | C19  | 1.382(3) |
| C4   | C5              | 1.403(2)   | C19  | C20  | 1.379(3) |
| C4   | C9              | 1.395(2)   | C20  | C21  | 1.386(2) |
| C4   | B1              | 1.650(2)   | C22  | C23  | 1.507(4) |
| C4   | Li1             | 2.457(3)   | C23  | C24  | 1.516(4) |
| C5   | C6              | 1.389(2)   | C24  | C25  | 1.496(3) |
| C5   | Li1             | 2.534(3)   | C26  | C27  | 1.500(3) |
| C6   | C7              | 1.379(3)   | C27  | C28  | 1.494(4) |
| C7   | C8              | 1.377(3)   | C28  | C29  | 1.501(3) |
| C8   | C9              | 1.397(2)   | B1   | Li1  | 2.755(3) |

<sup>1</sup>**1-X,1-Y,1-Z**

**Table S7 Bond Angles for 3-M.**

| Atom | Atom | Atom            | Angle/°    | Atom | Atom | Atom | Angle/°    |
|------|------|-----------------|------------|------|------|------|------------|
| C1   | O1   | B1              | 124.49(12) | C18  | C17  | C16  | 122.51(18) |
| C1   | O1   | Li1             | 128.80(13) | C17  | C18  | C19  | 120.68(18) |
| B1   | O1   | Li1             | 106.68(13) | C20  | C19  | C18  | 118.50(17) |
| C22  | O2   | C25             | 110.41(16) | C19  | C20  | C21  | 120.54(18) |
| C22  | O2   | Li1             | 123.09(15) | C20  | C21  | C16  | 122.43(17) |
| C25  | O2   | Li1             | 121.23(14) | O2   | C22  | C23  | 104.98(18) |
| C26  | O3   | Li1             | 123.25(14) | C22  | C23  | C24  | 103.30(18) |
| C29  | O3   | C26             | 106.82(15) | C25  | C24  | C23  | 101.8(2)   |
| C29  | O3   | Li1             | 125.95(15) | O2   | C25  | C24  | 104.34(17) |
| O1   | C1   | C2              | 117.80(14) | O3   | C26  | C27  | 104.22(17) |
| O1   | C1   | C3 <sup>1</sup> | 124.09(15) | C28  | C27  | C26  | 105.4(2)   |
| C2   | C1   | C3 <sup>1</sup> | 118.09(15) | C27  | C28  | C29  | 105.8(2)   |
| C3   | C2   | C1              | 121.47(15) | O3   | C29  | C28  | 105.85(18) |
| C2   | C3   | C1 <sup>1</sup> | 120.43(15) | O1   | B1   | C4   | 102.60(12) |
| C5   | C4   | B1              | 120.29(15) | O1   | B1   | C10  | 108.85(13) |
| C5   | C4   | Li1             | 76.70(12)  | O1   | B1   | C16  | 109.95(14) |
| C9   | C4   | C5              | 115.60(15) | O1   | B1   | Li1  | 40.66(9)   |
| C9   | C4   | B1              | 124.11(15) | C4   | B1   | Li1  | 61.95(10)  |
| C9   | C4   | Li1             | 111.82(13) | C10  | B1   | C4   | 110.97(14) |
| B1   | C4   | Li1             | 81.71(11)  | C10  | B1   | Li1  | 121.54(13) |
| C4   | C5   | Li1             | 70.70(12)  | C16  | B1   | C4   | 108.09(13) |
| C6   | C5   | C4              | 122.76(17) | C16  | B1   | C10  | 115.59(14) |
| C6   | C5   | Li1             | 114.72(13) | C16  | B1   | Li1  | 121.59(14) |
| C7   | C6   | C5              | 119.70(18) | O1   | Li1  | O2   | 116.87(16) |
| C8   | C7   | C6              | 119.59(17) | O1   | Li1  | O3   | 123.63(17) |
| C7   | C8   | C9              | 120.13(17) | O1   | Li1  | C4   | 69.00(10)  |
| C4   | C9   | C8              | 122.20(17) | O1   | Li1  | C5   | 88.56(12)  |
| C11  | C10  | C15             | 114.84(17) | O1   | Li1  | B1   | 32.66(7)   |
| C11  | C10  | B1              | 125.33(16) | O2   | Li1  | O3   | 104.63(15) |
| C15  | C10  | B1              | 119.83(15) | O2   | Li1  | C4   | 127.63(16) |
| C12  | C11  | C10             | 122.72(18) | O2   | Li1  | C5   | 95.87(14)  |
| C13  | C12  | C11             | 120.40(19) | O2   | Li1  | B1   | 130.08(15) |
| C12  | C13  | C14             | 118.73(19) | O3   | Li1  | C4   | 113.39(15) |
| C13  | C14  | C15             | 120.28(19) | O3   | Li1  | C5   | 124.46(15) |
| C14  | C15  | C10             | 123.04(18) | O3   | Li1  | B1   | 125.21(16) |
| C17  | C16  | B1              | 120.78(15) | C4   | Li1  | C5   | 32.60(7)   |
| C21  | C16  | C17             | 115.25(16) | C4   | Li1  | B1   | 36.34(7)   |
| C21  | C16  | B1              | 123.85(15) | C5   | Li1  | B1   | 59.97(8)   |

<sup>1</sup>I-X,I-Y,I-Z

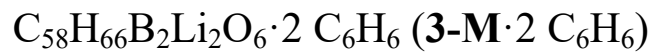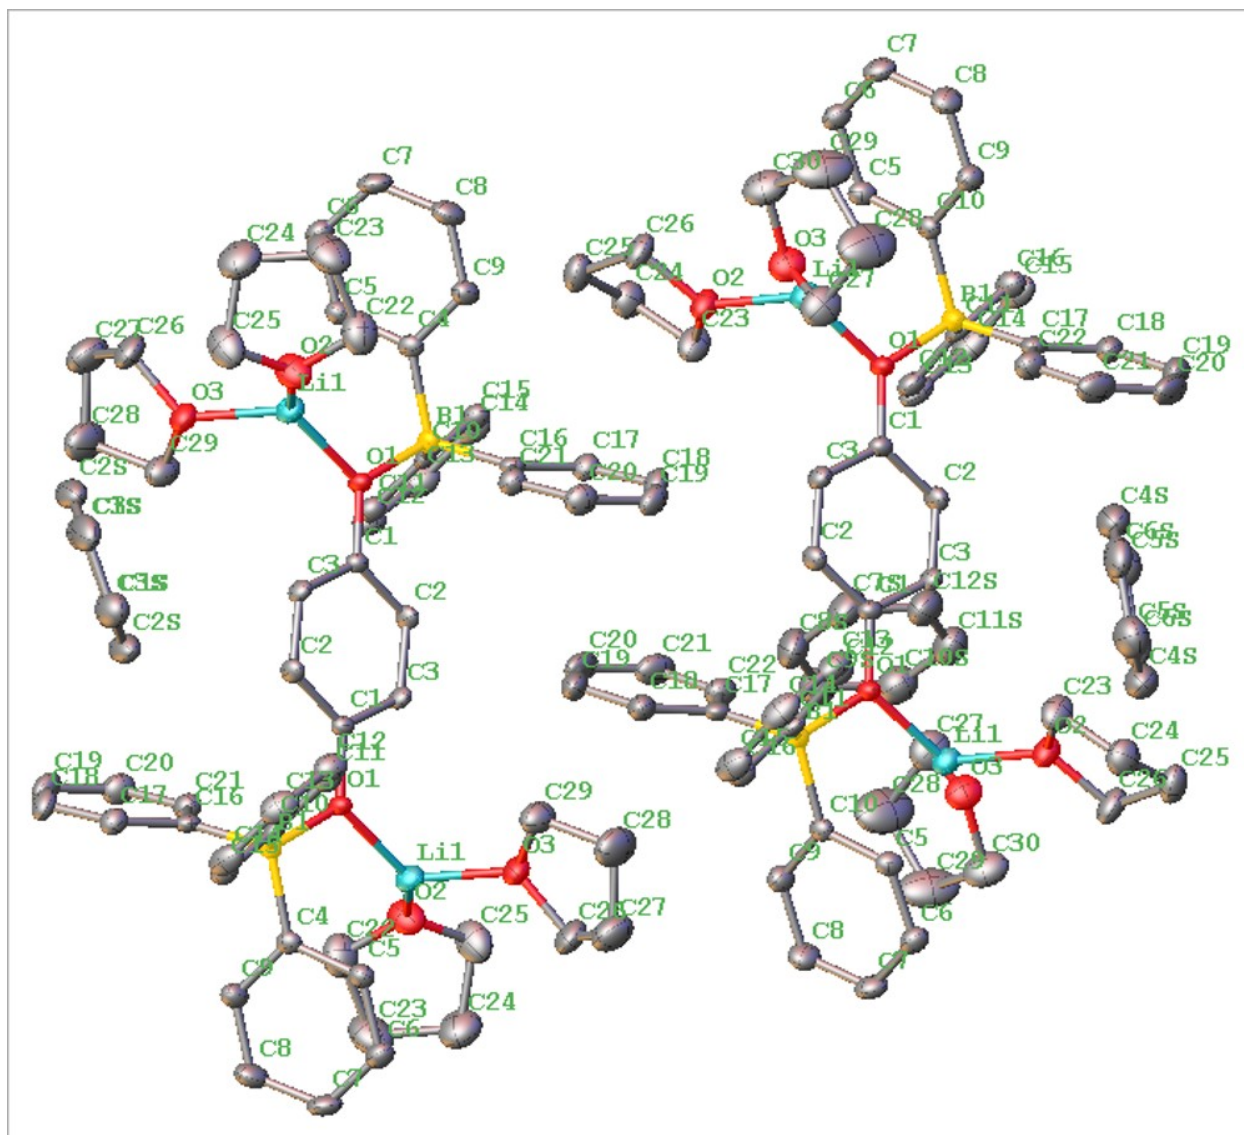

**Figure S23.** Thermal ellipsoid plot of **3-M**·2  $C_6H_6$  with labels. Hydrogen atoms omitted for clarity.

**Table S8 Crystal data and structure refinement for 3-M·2 C<sub>6</sub>H<sub>6</sub>.**

---

|                                             |                                                                               |
|---------------------------------------------|-------------------------------------------------------------------------------|
| Identification code                         | 3-M·2 C <sub>6</sub> H <sub>6</sub> .                                         |
| Empirical formula                           | C <sub>70</sub> H <sub>78</sub> B <sub>2</sub> Li <sub>2</sub> O <sub>6</sub> |
| Formula weight                              | 1050.82                                                                       |
| Temperature/K                               | 100.03                                                                        |
| Crystal system                              | triclinic                                                                     |
| Space group                                 | P-1                                                                           |
| a/Å                                         | 11.2628(17)                                                                   |
| b/Å                                         | 13.699(2)                                                                     |
| c/Å                                         | 20.426(3)                                                                     |
| α/°                                         | 98.899(4)                                                                     |
| β/°                                         | 104.077(4)                                                                    |
| γ/°                                         | 92.733(4)                                                                     |
| Volume/Å <sup>3</sup>                       | 3008.1(8)                                                                     |
| Z                                           | 2                                                                             |
| ρ <sub>calc</sub> /cm <sup>3</sup>          | 1.160                                                                         |
| μ/mm <sup>-1</sup>                          | 0.071                                                                         |
| F(000)                                      | 1124.0                                                                        |
| Crystal size/mm <sup>3</sup>                | 0.28 × 0.12 × 0.085                                                           |
| Radiation                                   | MoKα (λ = 0.71073)                                                            |
| 2θ range for data collection/°              | 2.086 to 50.122                                                               |
| Index ranges                                | -13 ≤ h ≤ 13, -16 ≤ k ≤ 16, -24 ≤ l ≤ 24                                      |
| Reflections collected                       | 77261                                                                         |
| Independent reflections                     | 10495 [R <sub>int</sub> = 0.0511, R <sub>sigma</sub> = 0.0323]                |
| Data/restraints/parameters                  | 10495/0/721                                                                   |
| Goodness-of-fit on F <sup>2</sup>           | 1.017                                                                         |
| Final R indexes [I ≥ 2σ (I)]                | R <sub>1</sub> = 0.0484, wR <sub>2</sub> = 0.1188                             |
| Final R indexes [all data]                  | R <sub>1</sub> = 0.0709, wR <sub>2</sub> = 0.1327                             |
| Largest diff. peak/hole / e Å <sup>-3</sup> | 0.67/-0.33                                                                    |



**Table S9 Bond Lengths for 3-M·2 C<sub>6</sub>H<sub>6</sub>.**

| Atom  | Atom              | Length/Å | Atom   | Atom               | Length/Å |
|-------|-------------------|----------|--------|--------------------|----------|
| O1_1  | C1_1              | 1.374(2) | O3_2   | C30_2              | 1.433(3) |
| O1_1  | B1_1              | 1.548(2) | O3_2   | Li1_2              | 1.903(3) |
| O1_1  | Li1_1             | 1.873(3) | C1_2   | C2_2               | 1.391(2) |
| O2_1  | C22_1             | 1.442(3) | C1_2   | C3_2 <sup>2</sup>  | 1.390(2) |
| O2_1  | C25_1             | 1.425(3) | C1S_2  | C2S_2              | 1.380(3) |
| O2_1  | Li1_1             | 1.906(3) | C1S_2  | C3S_2 <sup>3</sup> | 1.381(3) |
| O3_1  | C26_1             | 1.439(2) | C2_2   | C3_2               | 1.387(2) |
| O3_1  | C29_1             | 1.444(2) | C2S_2  | C3S_2              | 1.375(4) |
| O3_1  | Li1_1             | 1.914(3) | C4S_2  | C5S_2              | 1.379(4) |
| C1_1  | C2_1              | 1.391(2) | C4S_2  | C6S_2 <sup>4</sup> | 1.375(4) |
| C1_1  | C3_1              | 1.389(2) | C5_2   | C6_2               | 1.388(2) |
| C2_1  | C3_1 <sup>1</sup> | 1.385(2) | C5_2   | C10_2              | 1.409(2) |
| C4_1  | C5_1              | 1.409(2) | C5_2   | Li1_2              | 2.480(4) |
| C4_1  | C9_1              | 1.400(2) | C5S_2  | C6S_2              | 1.372(4) |
| C4_1  | B1_1              | 1.646(2) | C6_2   | C7_2               | 1.384(3) |
| C4_1  | Li1_1             | 2.633(4) | C7_2   | C8_2               | 1.381(3) |
| C5_1  | C6_1              | 1.388(2) | C7S_2  | C8S_2              | 1.376(4) |
| C5_1  | Li1_1             | 2.476(4) | C7S_2  | C12S_2             | 1.373(4) |
| C6_1  | C7_1              | 1.383(3) | C8_2   | C9_2               | 1.388(3) |
| C7_1  | C8_1              | 1.385(3) | C8S_2  | C9S_2              | 1.379(4) |
| C8_1  | C9_1              | 1.390(3) | C9_2   | C10_2              | 1.400(2) |
| C10_1 | C11_1             | 1.399(3) | C9S_2  | C10S_2             | 1.371(4) |
| C10_1 | C15_1             | 1.400(2) | C10_2  | B1_2               | 1.647(3) |
| C10_1 | B1_1              | 1.631(3) | C10_2  | Li1_2              | 2.556(4) |
| C11_1 | C12_1             | 1.386(3) | C10S_2 | C11S_2             | 1.376(4) |
| C12_1 | C13_1             | 1.378(3) | C11_2  | C12_2              | 1.399(3) |
| C13_1 | C14_1             | 1.381(3) | C11_2  | C16_2              | 1.402(3) |
| C14_1 | C15_1             | 1.388(3) | C11_2  | B1_2               | 1.630(3) |
| C16_1 | C17_1             | 1.395(3) | C11S_2 | C12S_2             | 1.376(4) |
| C16_1 | C21_1             | 1.403(3) | C12_2  | C13_2              | 1.392(3) |
| C16_1 | B1_1              | 1.635(3) | C13_2  | C14_2              | 1.380(3) |
| C17_1 | C18_1             | 1.394(3) | C14_2  | C15_2              | 1.379(3) |
| C18_1 | C19_1             | 1.379(3) | C15_2  | C16_2              | 1.389(3) |
| C19_1 | C20_1             | 1.381(3) | C17_2  | C18_2              | 1.395(3) |
| C20_1 | C21_1             | 1.385(3) | C17_2  | C22_2              | 1.403(3) |
| C22_1 | C23_1             | 1.508(3) | C17_2  | B1_2               | 1.633(3) |
| C23_1 | C24_1             | 1.513(4) | C18_2  | C19_2              | 1.397(3) |
| C24_1 | C25_1             | 1.505(3) | C19_2  | C20_2              | 1.375(4) |
| C26_1 | C27_1             | 1.505(3) | C20_2  | C21_2              | 1.378(4) |

**Table S9 Bond Lengths for 3-M·2 C<sub>6</sub>H<sub>6</sub>.**

| <b>Atom</b> | <b>Atom</b> | <b>Length/Å</b> | <b>Atom</b> | <b>Atom</b> | <b>Length/Å</b> |
|-------------|-------------|-----------------|-------------|-------------|-----------------|
| C27_1       | C28_1       | 1.480(3)        | C21_2       | C22_2       | 1.384(3)        |
| C28_1       | C29_1       | 1.500(3)        | C23_2       | C24_2       | 1.517(3)        |
| O1_2        | C1_2        | 1.370(2)        | C24_2       | C25_2       | 1.511(3)        |
| O1_2        | B1_2        | 1.547(2)        | C25_2       | C26_2       | 1.513(3)        |
| O1_2        | Li1_2       | 1.876(3)        | C27_2       | C28_2       | 1.474(4)        |
| O2_2        | C23_2       | 1.447(2)        | C28_2       | C29_2       | 1.522(4)        |
| O2_2        | C26_2       | 1.441(2)        | C29_2       | C30_2       | 1.506(4)        |
| O2_2        | Li1_2       | 1.897(3)        | B1_2        | Li1_2       | 2.819(4)        |
| O3_2        | C27_2       | 1.443(3)        |             |             |                 |

<sup>1</sup>-X,1-Y,1-Z; <sup>2</sup>1-X,1-Y,2-Z; <sup>3</sup>-1-X,1-Y,1-Z; <sup>4</sup>2-X,1-Y,2-Z

**Table S10 Bond Angles for 3-M-2 C<sub>6</sub>H<sub>6</sub>.**

| Atom              | Atom  | Atom  | Angle/°    | Atom               | Atom   | Atom               | Angle/°    |
|-------------------|-------|-------|------------|--------------------|--------|--------------------|------------|
| C1_1              | O1_1  | B1_1  | 123.78(13) | C3_2 <sup>2</sup>  | C1_2   | C2_2               | 118.19(16) |
| C1_1              | O1_1  | Li1_1 | 123.26(14) | C2S_2              | C1S_2  | C3S_2 <sup>3</sup> | 120.1(2)   |
| B1_1              | O1_1  | Li1_1 | 111.97(14) | C3_2               | C2_2   | C1_2               | 120.58(16) |
| C22_1             | O2_1  | Li1_1 | 126.44(16) | C3S_2              | C2S_2  | C1S_2              | 120.1(2)   |
| C25_1             | O2_1  | C22_1 | 104.53(16) | C2_2               | C3_2   | C1_2 <sup>2</sup>  | 121.22(16) |
| C25_1             | O2_1  | Li1_1 | 125.19(17) | C2S_2              | C3S_2  | C1S_2 <sup>3</sup> | 119.8(2)   |
| C26_1             | O3_1  | C29_1 | 108.85(15) | C6S_2 <sup>4</sup> | C4S_2  | C5S_2              | 120.1(2)   |
| C26_1             | O3_1  | Li1_1 | 123.07(15) | C6_2               | C5_2   | C10_2              | 122.68(17) |
| C29_1             | O3_1  | Li1_1 | 121.63(14) | C6_2               | C5_2   | Li1_2              | 113.91(14) |
| O1_1              | C1_1  | C2_1  | 123.84(15) | C10_2              | C5_2   | Li1_2              | 76.72(12)  |
| O1_1              | C1_1  | C3_1  | 118.02(14) | C6S_2              | C5S_2  | C4S_2              | 120.4(3)   |
| C3_1              | C1_1  | C2_1  | 118.13(15) | C7_2               | C6_2   | C5_2               | 119.90(17) |
| C3_1 <sup>1</sup> | C2_1  | C1_1  | 120.47(16) | C5S_2              | C6S_2  | C4S_2 <sup>4</sup> | 119.6(2)   |
| C2_1 <sup>1</sup> | C3_1  | C1_1  | 121.40(15) | C8_2               | C7_2   | C6_2               | 119.09(17) |
| C5_1              | C4_1  | B1_1  | 120.82(15) | C12S_2             | C7S_2  | C8S_2              | 119.8(3)   |
| C5_1              | C4_1  | Li1_1 | 67.94(12)  | C7_2               | C8_2   | C9_2               | 120.62(18) |
| C9_1              | C4_1  | C5_1  | 115.45(16) | C7S_2              | C8S_2  | C9S_2              | 120.5(2)   |
| C9_1              | C4_1  | B1_1  | 123.70(16) | C8_2               | C9_2   | C10_2              | 122.23(18) |
| C9_1              | C4_1  | Li1_1 | 125.27(14) | C10S_2             | C9S_2  | C8S_2              | 119.8(3)   |
| B1_1              | C4_1  | Li1_1 | 79.59(11)  | C5_2               | C10_2  | B1_2               | 120.15(15) |
| C4_1              | C5_1  | Li1_1 | 80.23(12)  | C5_2               | C10_2  | Li1_2              | 70.83(12)  |
| C6_1              | C5_1  | C4_1  | 122.80(17) | C9_2               | C10_2  | C5_2               | 115.42(16) |
| C6_1              | C5_1  | Li1_1 | 117.95(14) | C9_2               | C10_2  | B1_2               | 124.42(16) |
| C7_1              | C6_1  | C5_1  | 119.70(18) | C9_2               | C10_2  | Li1_2              | 117.13(14) |
| C6_1              | C7_1  | C8_1  | 119.40(17) | B1_2               | C10_2  | Li1_2              | 81.14(12)  |
| C7_1              | C8_1  | C9_1  | 120.26(18) | C9S_2              | C10S_2 | C11S_2             | 119.6(3)   |
| C8_1              | C9_1  | C4_1  | 122.33(18) | C12_2              | C11_2  | C16_2              | 115.45(17) |
| C11_1             | C10_1 | C15_1 | 115.14(16) | C12_2              | C11_2  | B1_2               | 124.11(16) |
| C11_1             | C10_1 | B1_1  | 124.19(16) | C16_2              | C11_2  | B1_2               | 120.42(16) |
| C15_1             | C10_1 | B1_1  | 120.59(16) | C12S_2             | C11S_2 | C10S_2             | 120.7(2)   |
| C12_1             | C11_1 | C10_1 | 122.74(18) | C13_2              | C12_2  | C11_2              | 122.53(19) |
| C13_1             | C12_1 | C11_1 | 120.55(19) | C7S_2              | C12S_2 | C11S_2             | 119.7(3)   |
| C12_1             | C13_1 | C14_1 | 118.41(18) | C14_2              | C13_2  | C12_2              | 120.1(2)   |
| C13_1             | C14_1 | C15_1 | 120.71(18) | C15_2              | C14_2  | C13_2              | 119.23(19) |
| C14_1             | C15_1 | C10_1 | 122.42(18) | C14_2              | C15_2  | C16_2              | 120.2(2)   |
| C17_1             | C16_1 | C21_1 | 115.63(17) | C15_2              | C16_2  | C11_2              | 122.48(19) |
| C17_1             | C16_1 | B1_1  | 124.67(16) | C18_2              | C17_2  | C22_2              | 115.24(18) |
| C21_1             | C16_1 | B1_1  | 119.60(16) | C18_2              | C17_2  | B1_2               | 124.83(18) |
| C18_1             | C17_1 | C16_1 | 122.29(18) | C22_2              | C17_2  | B1_2               | 119.93(17) |
| C19_1             | C18_1 | C17_1 | 120.39(18) | C17_2              | C18_2  | C19_2              | 122.1(2)   |

**Table S10 Bond Angles for 3-M·2 C<sub>6</sub>H<sub>6</sub>.**

| Atom  | Atom  | Atom              | Angle/°    | Atom  | Atom  | Atom  | Angle/°    |
|-------|-------|-------------------|------------|-------|-------|-------|------------|
| C18_1 | C19_1 | C20_1             | 118.82(18) | C20_2 | C19_2 | C18_2 | 120.7(2)   |
| C19_1 | C20_1 | C21_1             | 120.44(19) | C19_2 | C20_2 | C21_2 | 118.9(2)   |
| C20_1 | C21_1 | C16_1             | 122.42(18) | C20_2 | C21_2 | C22_2 | 120.1(2)   |
| O2_1  | C22_1 | C23_1             | 105.32(19) | C21_2 | C22_2 | C17_2 | 123.0(2)   |
| C22_1 | C23_1 | C24_1             | 105.02(19) | O2_2  | C23_2 | C24_2 | 105.45(16) |
| C25_1 | C24_1 | C23_1             | 103.2(2)   | C25_2 | C24_2 | C23_2 | 101.81(17) |
| O2_1  | C25_1 | C24_1             | 103.85(18) | C24_2 | C25_2 | C26_2 | 102.30(17) |
| O3_1  | C26_1 | C27_1             | 105.60(18) | O2_2  | C26_2 | C25_2 | 105.31(16) |
| C28_1 | C27_1 | C26_1             | 102.5(2)   | O3_2  | C27_2 | C28_2 | 104.8(2)   |
| C27_1 | C28_1 | C29_1             | 103.5(2)   | C27_2 | C28_2 | C29_2 | 104.3(2)   |
| O3_1  | C29_1 | C28_1             | 105.83(17) | C30_2 | C29_2 | C28_2 | 105.2(2)   |
| O1_1  | B1_1  | C4_1              | 103.37(13) | O3_2  | C30_2 | C29_2 | 105.8(2)   |
| O1_1  | B1_1  | C10_1             | 110.40(14) | O1_2  | B1_2  | C10_2 | 102.07(13) |
| O1_1  | B1_1  | C16_1             | 108.89(14) | O1_2  | B1_2  | C11_2 | 110.53(15) |
| C10_1 | B1_1  | C4_1              | 107.87(14) | O1_2  | B1_2  | C17_2 | 109.46(14) |
| C10_1 | B1_1  | C16_1             | 115.62(14) | O1_2  | B1_2  | Li1_2 | 38.57(9)   |
| C16_1 | B1_1  | C4_1              | 109.98(14) | C10_2 | B1_2  | Li1_2 | 63.60(11)  |
| O1_1  | Li1_1 | O2_1              | 127.01(18) | C11_2 | B1_2  | C10_2 | 108.53(14) |
| O1_1  | Li1_1 | O3_1              | 113.87(16) | C11_2 | B1_2  | C17_2 | 114.24(15) |
| O1_1  | Li1_1 | C4_1              | 65.07(10)  | C11_2 | B1_2  | Li1_2 | 119.10(13) |
| O1_1  | Li1_1 | C5_1              | 86.83(13)  | C17_2 | B1_2  | C10_2 | 111.33(15) |
| O2_1  | Li1_1 | O3_1              | 111.43(16) | C17_2 | B1_2  | Li1_2 | 124.90(14) |
| O2_1  | Li1_1 | C4_1              | 106.84(14) | O1_2  | Li1_2 | O2_2  | 114.73(16) |
| O2_1  | Li1_1 | C5_1              | 113.27(15) | O1_2  | Li1_2 | O3_2  | 126.94(18) |
| O3_1  | Li1_1 | C4_1              | 126.39(16) | O1_2  | Li1_2 | C5_2  | 88.05(13)  |
| O3_1  | Li1_1 | C5_1              | 97.24(14)  | O1_2  | Li1_2 | C10_2 | 66.15(11)  |
| C5_1  | Li1_1 | C4_1              | 31.83(7)   | O1_2  | Li1_2 | B1_2  | 30.94(7)   |
| C1_2  | O1_2  | B1_2              | 124.47(13) | O2_2  | Li1_2 | O3_2  | 108.22(16) |
| C1_2  | O1_2  | Li1_2             | 124.36(14) | O2_2  | Li1_2 | C5_2  | 97.79(14)  |
| B1_2  | O1_2  | Li1_2             | 110.49(14) | O2_2  | Li1_2 | C10_2 | 127.92(16) |
| C23_2 | O2_2  | Li1_2             | 122.77(14) | O2_2  | Li1_2 | B1_2  | 126.16(15) |
| C26_2 | O2_2  | C23_2             | 109.56(14) | O3_2  | Li1_2 | C5_2  | 115.82(15) |
| C26_2 | O2_2  | Li1_2             | 123.75(15) | O3_2  | Li1_2 | C10_2 | 109.07(15) |
| C27_2 | O3_2  | Li1_2             | 122.65(16) | O3_2  | Li1_2 | B1_2  | 125.59(15) |
| C30_2 | O3_2  | C27_2             | 106.52(16) | C5_2  | Li1_2 | C10_2 | 32.45(7)   |
| C30_2 | O3_2  | Li1_2             | 127.70(16) | C5_2  | Li1_2 | B1_2  | 59.63(9)   |
| O1_2  | C1_2  | C2_2              | 123.95(15) | C10_2 | Li1_2 | B1_2  | 35.26(7)   |
| O1_2  | C1_2  | C3_2 <sup>2</sup> | 117.86(15) |       |       |       |            |

<sup>1</sup>-X,1-Y,1-Z; <sup>2</sup>1-X,1-Y,2-Z; <sup>3</sup>1-X,1-Y,1-Z; <sup>4</sup>2-X,1-Y,2-Z
